# Supplementary material
Source: publisher figshare collection journal article supplement (https://gsapubs.figshare.com/ndownloader/files/22537436)
Supplement: Supplementary file 1 [file 22537436]

## Sheet: RAW DATA
SUPPLEMENTAL DATA FILE 2: POWICK ITRAX XRF ANALYSIS RAW DATA
Modelled Calendrical Date	Depth(cm)	Zr (cps)	Rb (cps)	Fe (cps)	Mn (cps)	Zr:Rb (Particle Size)	Zr:Fe (Flood Events)	Fe:Mn (Reducing Conditions)		Cu (cps)	Zn (cps)	As (cps)	Sr (cps)	Cd (cps)	Sb (cps)	Ba (cps)	Pb (cps)	Average Heavy Metals (counts)
2017	1	4438	2015.33	180432	3915	2.20212	0.0245965	46.0874		440.667	1819	0	2149	19.6667	72	24	532.667	632.125
2015.4	2	4895.8	2377.8	219590	4723	2.05896	0.0222952	46.4938		479	1634.4	0	2278	16	79	85.2	728.8	662.55
2011.95	3	4852.2	2891.8	279807	5779	1.67792	0.0173413	48.4179		514.4	2017.6	0	2514.4	0	120.8	379	989.2	816.925
2008.05	4	5359	3159.4	317047	6402.8	1.69621	0.0169029	49.5169		469.4	2326.6	0	2695.2	0	116.4	294.4	1065.4	870.925
2004.25	5	5564.6	3136.4	313208	6455.6	1.7742	0.0177665	48.5173		433.4	2186	0	2745	5.6	78.8	287.8	972.8	838.675
2000.4	6	5628.4	3206.2	315683	6525	1.75547	0.0178293	48.3805		473.2	2177.8	0	2708.6	2.4	97	453.6	918.4	853.875
1996.2	7	5805.6	3298.8	317743	6593.2	1.75991	0.0182713	48.1926		424.4	2083.6	0	2760.6	1.8	85.2	454.2	996.8	850.825
1991.95	8	5651.8	3246.6	308666	6471.4	1.74084	0.0183104	47.697		433.6	2081	0	2617	0	126.2	489.6	928	834.425
1987.2	9	5674.6	2975	281137	5703	1.90743	0.0201845	49.2963		564.8	2011	0	2599	5.2	103	416.4	908.2	825.95
1983.15	10	5258.2	2990.4	270822	5235.8	1.75836	0.0194157	51.7251		544.6	1931.8	0	2607.6	8.2	142.2	543.4	878	831.975
1979.05	11	5716.6	2711.2	245899	4856.4	2.10851	0.0232477	50.6341		450.6	1725.4	0	2322.8	1.8	73.2	414.6	828.6	727.125
1974.75	12	5661.8	2915.6	270373	5537.6	1.9419	0.0209407	48.8249		484.4	1922.8	0	2618.6	9	70	290.2	845.6	780.075
1970	13	5776.8	2752.8	255448	5300.4	2.09852	0.0226144	48.1941		503	1892.4	0	2521.2	18.2	122	436.6	928.8	802.775
1965.65	14	5806	3016.8	269282	5502.6	1.92456	0.021561	48.9372		511.4	1954.4	0	2524.2	0	108	419.8	766	785.475
1961.5	15	5005.6	2549.6	199390	4360.8	1.96329	0.0251046	45.7232		352.6	1480.8	0	2248	7	66.8	164.6	741	632.6
1957.3	16	5155.4	2644.4	223362	4287.8	1.94955	0.0230809	52.0924		421	1624.2	0	2293	0	93.8	290	625	668.375
1952.6	17	5413.4	2651.6	239001	4724.6	2.04156	0.0226501	50.5866		351.4	1654.4	0	2396.2	4.8	97.6	362.8	593.8	682.625
1948.25	18	5803	2756.6	248333	4993.6	2.10513	0.0233678	49.7302		361	1757	0	2403.2	9.6	101.4	443.4	576.2	706.475
1943.95	19	6148.6	3011.4	270437	5798.4	2.04177	0.0227358	46.64		370.2	1930.2	0	2566.4	3.4	86.4	568.8	629	769.3
1939.2	20	5114.6	2574.6	230957	4784.8	1.98656	0.0221452	48.2689		275.4	1533.4	0	2199	6	64.2	293.8	620.2	624
1934.95	21	5540.2	2732	256336	5337.8	2.02789	0.0216131	48.0227		324.4	1776.4	0	2377.2	0	96.2	387.8	787.4	718.675
1930.65	22	4966.2	2668.8	238565	4892.6	1.86084	0.0208169	48.7605		390.4	1703.2	0	2267	6.2	110.8	538.4	706.8	715.35
1926.4	23	5777.4	2781.8	258538	5492.2	2.07686	0.0223464	47.0736		420	1776	0	2456.6	0	107.6	475	759.8	749.375
1921.65	24	5729.4	2818.4	254418	5265.8	2.03286	0.0225196	48.3152		412.2	1698.2	0	2460.8	7.2	91	372.6	718.6	720.075
1917.45	25	5874	2792.8	257976	5242	2.10327	0.0227696	49.2132		398	1867.6	0	2548.4	1.6	106.6	384.4	815	765.2
1913.25	26	5704	2863.2	261341	5207.2	1.99218	0.0218259	50.1885		447.2	1821.2	0	2390.2	0	103	449.6	767	747.275
1909.05	27	5472.6	2867	248602	5168.2	1.90882	0.0220135	48.1023		461.4	1778.8	0	2444.4	1.2	130.6	362.8	577.2	719.55
1904.3	28	5610.4	2669.4	236692	5163.4	2.10175	0.0237034	45.8404		393.8	1642.8	0	2332.4	6.2	99	353	668	686.9
1900.2	29	5655.4	2618.2	236220	5020.6	2.16003	0.0239412	47.0502		311.6	1564.6	0	2537.2	0	70.8	392.6	663.6	692.55
1895.9	30	5107.8	2432.6	220075	4607.2	2.09973	0.0232093	47.7677		306	1439	0	2167.4	0	81.8	358.2	613.2	620.7
1891.7	31	5814.8	2680.2	267141	6058.6	2.16954	0.0217668	44.0929		341	1729.6	0	2309.8	0	105.4	464.2	818.2	721.025
1887.05	32	6900.8	2843	280053	6475.4	2.4273	0.0246411	43.2488		374.8	1667.8	0	2491.4	0	121.2	464.2	780.2	737.45
1882.8	33	6141.2	2844	278846	5743.4	2.15935	0.0220237	48.5506		366.4	1790.4	0	2508.4	1.4	106.8	359.6	728.4	732.675
1878.4	34	6167	2870.8	279967	5934.6	2.14818	0.0220276	47.1754		359.4	1865	0	2468.8	0	102.2	444	689	741.05
1874.05	35	5909.4	2746.8	256283	5307.2	2.15138	0.0230581	48.2896		342.8	1842	0	2265.8	2.8	70.2	457.4	644.8	703.225
1869.9	36	5482.9	2514.8	239676	5303.1	2.18025	0.0228763	45.1954		264.1	1615.2	0	2209.1	2.8	99.5	420.8	554.3	645.725
1865.2	37	5265.9	2629.9	252268	5257.6	2.00232	0.0208742	47.9816		287.5	1723.4	0	2100.5	1.7	95.1	450.1	502.3	645.075
1861	38	5382.4	2449.5	236731	5289.8	2.19735	0.0227364	44.7524		182.9	1637.2	0	2160.4	10.2	121.7	479.1	475.5	633.375
1856.75	39	5584.9	2475.2	224521	4839.6	2.25634	0.0248747	46.3925		298.5	1501.5	0	2224.6	7.2	75.8	349.9	735.8	649.162
1852.05	40	5898.8	2484.2	229753	5640.2	2.37453	0.0256745	40.7349		247.5	1587.7	0	2318	0	94.3	339.5	630.5	652.188
1847.85	41	5244.8	2151.2	206771	4457.8	2.43808	0.0253652	46.3841		257.9	1354	0	1996.8	2.5	72	333.5	660.8	584.688
1843.65	42	4813.8	2232.6	207162	4583	2.15614	0.0232369	45.2023		155.2	1343.2	0	2003.6	0	78	420.2	555.4	569.45
1839.05	43	4887.4	1981.6	190032	4651.6	2.46639	0.0257188	40.8531		153	1264	0	1965.6	2	71.6	323.6	647.2	553.375
1834.85	44	4649	2222	210282	4401.2	2.09226	0.0221084	47.7782		168.8	1377.6	0	2031.2	3.2	66.6	311.6	537	562
1830.6	45	4511	2183.6	204352	4053.6	2.06585	0.0220747	50.4124		212	1323.4	1.8	1993	0	86.6	248.4	653.8	564.875
1826.5	46	4828.8	2278.6	217081	4845.2	2.1192	0.0222442	44.8033		248.4	1394.4	0	1951	6	80.8	356.8	686.8	590.525
1821.9	47	4245.6	2134.4	205043	4000.2	1.98913	0.0207059	51.2581		270.2	1287.6	0	1861.8	0	56	239.4	765.2	560.025
1817.65	48	4622.2	2511.2	236845	4582.4	1.84063	0.0195157	51.6859		217.8	1468	0	2106	1.6	71.4	285.2	754	613
1813.6	49	4954	2508.2	232846	4743.2	1.97512	0.0212759	49.0904		291.2	1518.8	0	2098.8	2.6	76.2	278.4	706.4	621.55
1809	50	4602	2333.6	209171	4142.8	1.97206	0.0220012	50.4902		254	1368	0	1933.4	5.2	62	270.8	638	566.425
1804.95	51	4446.6	2478.2	226230	4028.2	1.79429	0.0196552	56.1617		231.4	1489	3.6	2008	0	78.6	201	558.6	571.275
1801	52	4237.75	2287.5	195993	3986.25	1.85257	0.021622	49.1672		249.25	1261.5	0	1820.5	4.25	56.25	277.75	509.5	522.375
1796.85	53	4083.4	2033.4	187083	3672	2.00816	0.0218267	50.9486		192.4	1156	0	1771.2	0	51.8	351	583	513.175
1792.2	54	4346	2237.8	202854	3856.6	1.94209	0.0214243	52.5992		287.6	1315.8	0	1801.6	10.4	66.4	415.6	566	557.925
1788.05	55	4407.4	2286	200530	3790.4	1.928	0.0219788	52.9047		263	1312.6	0	1814.6	1.6	63.6	270.8	644.8	546.375
1784.1	56	4299.2	2470.8	232973	4560.4	1.74	0.0184537	51.086		294.4	1474.6	0	2041.8	6	73.4	339.8	570	600
1780	57	4006	2349.8	215009	4468	1.70483	0.0186318	48.122		298.6	1352	0	1742	1	62	393.2	593.4	555.275
1775.85	58	3947.4	2347	219404	3986.2	1.68189	0.0179915	55.0409		301.2	1393.2	0	1773.8	6.4	90	478.6	605.2	581.05
1771.75	59	3377.8	1985.6	172748	2920.8	1.70115	0.0195534	59.1439		273.6	1103.8	0	1558	3.2	70	209.6	599.8	477.25
1767.5	60	3937.2	2430.4	229832	4268.6	1.61998	0.0171308	53.8424		194.4	1437.8	0	1979.4	7.2	48.4	389.6	611.4	583.525
1763.35	61	4042.4	2510.4	232315	4960.8	1.61026	0.0174005	46.8301		232.8	1410.6	0	1927.8	6.6	100.4	337.6	672.8	586.075
1758.55	62	4019.8	2440.2	223091	3713.4	1.64732	0.0180187	60.0772		174.6	1371.2	0	1873	6	64.6	331	665	560.675
1754.35	63	3762.6	2258.8	199053	3289.6	1.66575	0.0189025	60.5097		294	1243.8	0	1748	0.8	72.4	369	650.4	547.3
1750	64	3931.8	2300.4	206533	3269.4	1.70918	0.0190372	63.1715		226.6	1267	5.2	1757	2	94.6	349.4	467.8	521.2
1745.25	65	3355	1815	218527	3373	1.84848	0.0153528	64.7871		289	1390	0	1385	0	93	376	409	492.75
1741	66	3531.17	2010.83	200510	3220.33	1.75607	0.0176109	62.2639		263.167	1283.33	0	1545.5	2	85.1667	265.167	315.667	470
1736.75	67	3707.33	2206.67	182494	3067.67	1.68006	0.0203148	59.4895		237.333	1176.67	0	1706	4	77.3333	597.667	595.667	549.333
1732.65	68	3468.75	2101	162224	2667.25	1.651	0.0213824	60.8209		244.25	1032.75	0	1637.5	0	47.25	259.5	567.5	473.594
1727.9	69	4292.2	2823	253807	4123.8	1.52044	0.0169112	61.547		278	1598.4	0	2126.2	3.8	99.6	544.4	477	640.925
1723.85	70	3535	1980.6	170886	2956.4	1.78481	0.0206863	57.8021		256.2	958.2	0	1661	5.4	41	197.6	403.6	440.375
1719.75	71	4213.5	2610.3	241923	3984.6	1.61418	0.0174167	60.7144		262.6	1425.3	0	2032.6	5.8	84.7	360.4	478.8	581.275
1715.05	72	4697.5	2774.8	269593	4395.4	1.69291	0.0174244	61.3354		264.4	1559.1	0	2196.2	3.1	92.6	412.9	660	648.537
1710.95	73	4765.2	2996.3	276136	5174.8	1.59036	0.0172567	53.3616		283.9	1575	0	2265.6	2.9	85.4	420.1	653.9	660.85
1706.8	74	4685.3	2864.7	263979	4531.3	1.63553	0.0177488	58.2567		362	1590.6	0	2243.4	3.5	95.2	459	667.6	677.663
1702.2	75	4820.8	3033.6	288474	5035.9	1.58914	0.0167114	57.2836		307.8	1679.1	0	2390.9	0	86.1	466.4	467.5	674.725
1698	76	5562	3626.6	337878	5357.2	1.53367	0.0164616	63.0698		419.2	1919.4	0	2702.6	2.2	100.8	491.8	608.6	780.575
1693.35	77	5451.8	3455.4	326006	5886.4	1.57776	0.016723	55.383		381.2	1806.6	3	2620.8	5	114	476	627.6	754.275
1689.2	78	5597.2	3723.2	359832	5212	1.50333	0.015555	69.0392		468.8	1690.4	0	2783.2	9.4	106.6	474.8	617.8	768.875
1684.9	79	5494	3724.4	344723	5379.8	1.47514	0.0159374	64.0773		344.6	1699.2	0	2750.4	7.4	143.8	536.6	426.4	738.55
1680	80	5530.8	3661	345458	5080.4	1.51073	0.0160101	67.9981		405	1681.8	0	2693	0	125	437	554.6	737.05
1675.7	81	5214.6	3450.4	307681	4442.4	1.5113	0.0169481	69.26		326.2	1357.2	0	2519.2	4.8	74.4	348	442.8	634.075
1671.1	82	5198.4	3373.6	287840	5334.8	1.54091	0.01806	53.9552		209.6	1230	0	2433.6	0	116.8	360.6	363.8	589.3
1666.95	83	5262.4	3443.6	335395	4733.4	1.52817	0.0156902	70.8571		224.6	1331	0	2632	0	70.6	306.8	321.4	610.8
1662.45	84	5245	3553	326730	4980.8	1.47622	0.016053	65.5979		370.2	1411.6	0	2545	8	92.8	552.6	509	686.15
1658.2	85	4781.2	3280	294384	4203.8	1.45768	0.0162414	70.0281		255.4	1259.4	0	2429.6	3.6	80.4	494.2	377	612.45
1653.5	86	5258.2	3517	338014	5363	1.49508	0.0155562	63.027		349.8	1426.8	0	2572.8	3.6	99.8	481.6	371.8	663.275
1649.55	87	5289.4	3638.6	363795	4910	1.45369	0.0145395	74.0926		1200.4	1806.8	0	2778.8	2.4	108.4	597	429.8	865.45
1645.5	88	5398	3679.2	361426	6204.4	1.46717	0.0149353	58.2531		1820	2018	0	2681.2	4.2	124.4	669.2	447.2	970.525
1640.9	89	5574.4	3649.4	366380	5281.8	1.52748	0.0152148	69.3665		953	1737.2	0	2785	0	135	498.2	373.6	810.25
1636.25	90	5290.4	3820.8	345529	4459.6	1.38463	0.015311	77.4798		410.4	1544.2	0	2684.6	8.6	118.8	541.2	443.8	718.95
1632.05	91	5235	3478.4	325976	4980.4	1.505	0.0160595	65.4517		349.2	1378.4	0	2494.4	4.6	110.4	465.6	501	662.95
1627.6	92	5533.4	3739.8	351462	5093.2	1.4796	0.0157439	69.0061		289.6	1496	0	2696.8	5.2	141.6	555.6	308.8	686.7
1623.4	93	4887.8	3171.8	314044	4332.2	1.54102	0.0155641	72.4906		324.8	1307.8	0	2363.6	3.8	80	384.4	398.4	607.85
1618.9	94	5213.4	3411.6	326311	4369.2	1.52814	0.0159768	74.6843		816.4	1510.2	0	2482.4	7.4	107.6	574.4	469.6	746
1614.75	95	5135.8	3397.2	312654	4046.6	1.51177	0.0164264	77.2635		317.4	1295	0	2332.2	0	119.8	478.2	441	622.95
1610.2	96	5080.8	3232.4	315738	4543.6	1.57184	0.0160918	69.4907		260.2	1356.4	7.8	2381.2	0	91.6	422.4	374.8	611.8
1606.35	97	4685.4	3086.2	300089	4509	1.51818	0.0156134	66.5532		353	1204.2	0	2246.8	3.8	144	408.8	377.6	592.275
1601.95	98	4877.6	3450.4	318082	4172	1.41363	0.0153344	76.2422		315.2	1279.2	0	2416.6	0	132.6	462.6	235	605.15
1597.8	99	4828.6	3373.4	311726	4515.8	1.43137	0.0154899	69.03		274.4	1283.4	0	2344.8	9.4	144	454.8	442.2	619.125
1593.1	100	5108.4	3347.8	330495	4388.2	1.5259	0.0154568	75.3145		304	1304.4	0	2555.4	11.6	120.8	354.8	370	627.625
1589.05	101	5007.2	3300.4	334085	4842.8	1.51715	0.0149878	68.9859		410.4	1429.8	0	2348.8	0	148.4	570.8	550.6	682.35
1585.2	102	4919.4	3462.4	319663	4935.4	1.42081	0.0153893	64.7695		316	1301.4	0	2393	5	132	570	418.2	641.95
1580.9	103	4947.6	3320.6	308098	3971	1.48997	0.0160585	77.587		302.2	1254.8	0	2455.8	5.6	91	485	393.8	623.525
1577.1	104	5246	3391.2	321656	4041	1.54695	0.0163093	79.5981		369.6	1347.4	0	2471	4.8	70.4	389.6	372.8	628.2
1573.1	105	5058.8	3500	322364	4099.6	1.44537	0.0156928	78.6331		293.6	1273.4	0	2454	1.8	87.4	530.6	424.2	633.125
1568.55	106	5126.8	3539	321597	4633.6	1.44866	0.0159417	69.4054		301.4	1372.8	0	2494.8	0	109.6	346	421	630.7
1564.55	107	5010.8	3567	316774	4518.2	1.40477	0.0158182	70.1107		354	1316.2	0	2495.8	0	121.8	571	601	682.475
1560.3	108	4810.6	3308	314938	4031.8	1.45423	0.0152747	78.1135		343	1394.4	0	2386.8	0	110.6	413.2	456.8	638.1
1555.85	109	4564.2	3091.7	287644	3913.9	1.47628	0.0158675	73.493		294.8	1300.1	0	2228	1.8	109	376.8	563.2	609.212
1551.55	110	4768.3	3333.4	310269	4158.3	1.43046	0.0153683	74.6143		177.7	1306.3	3	2435.8	4	75.2	379	363.5	593.062
1547.65	111	4001.8	3096.2	286803	8518	1.29249	0.0139531	33.6702		197.8	1237.6	0	2126.4	0	95.4	501.8	375.8	566.85
1542.9	112	4146.8	3069.4	294017	4165.8	1.35101	0.014104	70.5787		672.2	1299	0	2200.8	9.4	78	545.8	258.2	632.925
1538.55	113	4235.4	3075.6	291482	5432.2	1.3771	0.0145306	53.6582		990.2	1462	0	2097	5.8	85.6	507.8	340	686.05
1533.95	114	3906.8	3185.4	292719	3927.4	1.22647	0.0133466	74.5326		934.4	1494	3.8	2151.2	0	79.4	478.6	260.2	675.2
1529.2	115	3826.6	3242.4	299495	6055.4	1.18018	0.0127768	49.4591		302	1298.4	25.8	2090.4	2	73.4	600.2	184.2	572.05
1524.4	116	3794.8	3065.8	301296	5784.4	1.23778	0.0125949	52.0876		485.8	1313.2	0	2204.6	0	70.2	493.6	260.4	603.475
1520.2	117	3892.6	3420.6	311907	5404.2	1.13799	0.01248	57.7156		254.8	1314.2	0	2241.2	4.6	94.8	582.8	293.6	598.25
1515.8	118	3588.2	3264.6	282802	3890.8	1.09912	0.012688	72.6848		159.6	1177	0	2111.2	7.8	101	508.4	326	548.875
1511.35	119	3624.2	3395	309110	3478.4	1.06751	0.0117246	88.8656		206	1191.6	0	2180	2.8	91.4	504.6	317	561.675
1506.8	120	3729.6	3301.6	304613	4556.6	1.12963	0.0122437	66.8509		159.4	1239.2	0	2206	4.8	84.6	332	243	533.625
1502.15	121	3729.6	3301.6	304613	4556.6	1.12963	0.0122437	66.8509		159.4	1239.2	0	2206	4.8	84.6	332	243	533.625
1497.6	122	3733.8	3460.4	319552	6142.2	1.07901	0.0116845	52.0257		188.2	1327	0	2226	3.4	109.2	635.2	378.6	608.45
1493.55	123	3602.8	3420.4	307925	4140.2	1.05333	0.0117002	74.3745		164.4	1268.8	0	2232.4	0	93.6	452.2	367.8	572.4
1489.35	124	3496.2	3268.6	304095	4345.4	1.06963	0.011497	69.981		258	1237	0	2081.2	4.2	105.2	448	152	535.7
1484.5	125	3537.2	3388.8	306026	4004.2	1.04379	0.0115585	76.4262		279.2	1222.6	0	2170	1.8	54.2	491.6	271	561.3
1480.1	126	3454.4	3342.4	305836	4500.8	1.03351	0.0112949	67.9515		258	1310.8	0	2133.4	0	85.8	458	155.6	550.2
1476.1	127	3581.4	3391.4	314854	4522.6	1.05602	0.0113748	69.618		273.6	1280	0	2146.4	0	79	422	336.2	567.15
1471.6	128	3629.8	3596.6	320129	4803.6	1.00923	0.0113386	66.6435		252.6	1343.8	0	2171.4	0	95.6	595.6	317.8	597.1
1467.5	129	3402	3248.4	290999	4288.6	1.04728	0.0116908	67.8541		263	1260.2	0	2085.6	0	84.2	495	228.8	552.1
1463.35	130	3472.2	3187.8	300366	4406.8	1.08922	0.0115599	68.1597		396.8	1239.8	3.2	2025.4	3.2	60	472.8	216.6	552.225
1459.1	131	3494.4	3331	305502	4699	1.04905	0.0114382	65.0142		275	1305	0	2079	6.2	92.2	552.6	206.2	564.525
1454.7	132	3354	3106.4	303014	3591	1.07971	0.0110688	84.3816		231.4	1237.2	19	2115.2	0	69	540	150.8	545.325
1450.85	133	3498.4	3335.4	313689	3767.6	1.04887	0.0111524	83.2596		397.8	1388.8	0	2092	0	102.2	458.6	220.4	582.475
1446.8	134	3388	3226.8	297303	3621.2	1.04996	0.0113958	82.1008		181.4	1240.4	0	2106	1.4	81.8	399	343.4	544.175
1442.25	135	3591.1	3476	308005	3847.5	1.03311	0.0116592	80.0533		307.7	1342.7	0	2181.1	0.8	65.7	423.8	202.1	565.488
1438.1	136	4143.5	3849.6	336399	5473.2	1.07635	0.0123172	61.4629		274.4	1409.2	0	2406.5	0.8	77.8	471.2	358.7	624.825
1434.2	137	4020.9	3718.1	338270	4576.9	1.08144	0.0118867	73.9081		340.4	1469.6	3	2343.6	0	101.4	477.7	347.8	635.438
1429.9	138	4115.2	3833.1	337721	4879.9	1.0736	0.0121852	69.2065		375.2	1430.9	0	2351.5	0	86	550.5	369.6	645.463
1426.05	139	4548.8	4243.6	390094	5038.2	1.07192	0.0116608	77.4273		545.6	1660.2	0	2779.8	0	105.6	466.6	358.6	739.55
1421.95	140	4081.8	3962.4	353857	3773.6	1.03013	0.0115352	93.7717		439	1466.4	0	2478.4	4.2	123.2	366.8	235	639.125
1417.75	141	4437.2	4044.2	380409	4724.2	1.09718	0.0116643	80.5234		486	1618.8	0	2519.6	0	124	552.8	340.2	705.175
1413.75	142	4549	4235.8	383707	6742.4	1.07394	0.0118554	56.9095		383.6	1561.8	0	2673	5.4	130.2	643.2	371.4	721.075
1410.1	143	4371.4	4386.4	387559	5037.4	0.99658	0.0112793	76.9362		376.6	1578.8	0	2719.8	4.2	81.2	427.2	363.8	693.95
1406.35	144	4333.8	4357.6	390912	5591	0.994538	0.0110864	69.918		352.8	1592.8	0	2676.2	0	139.8	555.4	473.2	723.775
1402.5	145	4368.2	4188.2	386771	5015.8	1.04298	0.011294	77.1105		400.8	1602.2	0	2530.4	0	132.2	584.2	317.4	695.9
1398.35	146	4146.4	4168.6	364606	5458.8	0.994674	0.0113723	66.7923		697.8	1572.6	0	2439.8	0	117.4	591.4	351.6	721.325
1394.6	147	4321.2	4141.2	380944	6921.4	1.04347	0.0113434	55.0385		560.8	1674	0	2548.2	0	99.6	515.2	399.4	724.65
1390.75	148	4064.8	3821.6	359441	6721.2	1.06364	0.0113087	53.4786		489	1572.8	0	2375	0	85.8	502.6	298.8	665.5
1386.8	149	4464.2	4299.8	393184	7444.6	1.03823	0.011354	52.8147		593.8	1797.6	0	2625.8	1.8	127	571.2	473	773.775
1382.25	150	4263.8	4115.4	366659	7010	1.03606	0.0116288	52.3051		462.4	1585.4	0	2529.4	3	110.4	708.6	460.8	732.5
1378.75	151	4098	4092.4	377274	7122.8	1.00137	0.0108621	52.9671		349.2	1581.2	0	2581.6	0	93.6	443.8	260	663.675
1374.9	152	4250.2	4146.6	369722	7139	1.02498	0.0114957	51.789		357.4	1504.6	0	2429.2	4	92	619.4	275.8	660.3
1370.9	153	4148.4	4178.8	381701	8441.4	0.992725	0.0108682	45.2177		389.4	1586.8	0	2662	0	100.6	602.6	514.4	731.975
1367	154	4379.2	4134.4	376984	6213	1.05921	0.0116164	60.6766		408.6	1526.8	0	2543.4	0	117.2	457	289.8	667.85
1363	155	4437.6	4261.2	380517	9870.8	1.0414	0.011662	38.5498		495.8	1609.4	0	2685.4	0	117.6	446.6	276.8	703.95
1358.5	156	4450.2	4190.6	371374	9239.4	1.06195	0.0119831	40.1946		519.2	1578.4	0	2637.8	0	123.2	631.6	297.8	723.5
1354.45	157	4384	4230.4	372633	7044.8	1.03631	0.0117649	52.8947		527.6	1506.6	7.4	2619.2	1.6	112	539	275.8	698.65
1350.3	158	4582	4099.8	377093	7432.8	1.11762	0.0121509	50.7336		453	1611.6	0	2722.8	0	90.6	662.2	350.2	736.3
1346.25	159	4637.4	4017	368560	7729	1.15444	0.0125825	47.6853		1169.4	1789.8	0	2659.6	0	76.6	653.6	268.4	827.175
1342	160	4629.4	3978.4	351836	6687.2	1.16363	0.0131578	52.6134		492.6	1489.4	0	2580	2.2	108.8	425.2	336.8	679.375
1337.95	161	4853.4	3911.4	354132	6167.4	1.24083	0.0137051	57.4199		321.6	1540.8	0	2753.8	0	103.4	573.6	415.4	713.575
1334.2	162	4931.8	4120.6	359078	6148.8	1.19686	0.0137346	58.398		301.6	1562.2	0	2791.8	0	104.6	506	382.6	706.1
1329.8	163	4823.2	4099	370899	6190.2	1.17668	0.0130041	59.9172		474.6	1601.6	13.8	2806.6	9.6	125.8	600.2	235.4	733.45
1325.9	164	5023.4	4194.2	379586	8197	1.1977	0.0132339	46.308		409.6	1608	51.2	2712	0	141.2	502.8	333.2	719.75
1322	165	4995.6	4041.6	357863	7170.8	1.23605	0.0139595	49.9056		362.6	1542	0	2747.8	4	118.8	487	294.4	694.575
1318.2	166	5030.2	4010.8	351928	6627.2	1.25416	0.0142933	53.1035		310.4	1534.2	0	2658.6	0	112.2	362.2	359.2	667.1
1314.35	167	4984.4	3973.6	357723	7117.2	1.25438	0.0139337	50.2618		392	1520.8	0	2660.6	3.4	117.4	657.2	391.4	717.85
1310.55	168	5005.4	3962.4	358180	7596	1.26322	0.0139745	47.1538		332	1570.2	0	2719.6	1.2	133.4	447.4	418.6	702.8
1306.15	169	5323.8	3809.2	351551	7876.4	1.39762	0.0151438	44.6334		277.2	1483.6	0	2769.2	0	87.8	341.2	239.8	649.85
1302.15	170	5359.2	3967.6	357539	7053.4	1.35074	0.0149892	50.6902		391	1617.2	0	2793	0	132.4	507.2	295.8	717.075
1298.2	171	4594.4	3464.6	295978	6475.2	1.3261	0.0155228	45.7094		351.3	1579.8	0	2333.2	5.5	118.2	515.1	522.2	678.162
1294.3	172	5003.2	3590.5	323747	6631.9	1.39345	0.015454	48.8166		324.9	1451.4	8.7	2463.6	4.2	99.5	357.3	343.4	631.625
1290	173	5223.3	3687.7	339835	6732.7	1.41641	0.0153701	50.4754		360.5	1546.2	0	2621	0	112.4	494	516.8	706.362
1286.05	174	5194.8	3854.7	341428	7212.9	1.34765	0.0152149	47.3358		389.5	1566.9	0	2680.5	0	115.7	542.8	566.1	732.688
1282.15	175	5345.7	3833.1	347809	7138.3	1.39462	0.0153696	48.7243		434.4	1613.4	0	2777.4	2.3	89.1	468.4	603.7	748.588
1278.25	176	5166.8	3728	338421	7705.6	1.38594	0.0152674	43.9188		417.6	1499.8	0	2617.6	0	105.2	443.6	410.6	686.8
1274.05	177	5058.6	3731.6	346316	7118.2	1.35561	0.0146069	48.6522		437.8	1576.2	0	2644.8	0	141	616	589.2	750.625
1270.25	178	5197.4	3841.6	356132	5917	1.35293	0.014594	60.188		436	1512.4	0	2655	0	104	482.4	477.8	708.45
1266.4	179	5153.2	3988.6	340282	5983.2	1.29198	0.0151439	56.873		392	1559.8	0	2567.2	0	124.2	490.4	464.8	699.8
1262.5	180	5131.8	3700.8	333194	5478.8	1.38667	0.0154018	60.8151		346	1445.6	0	2548.4	0	124.8	563	343.6	671.425
1258.1	181	5290.2	3819	345436	5667.4	1.38523	0.0153145	60.9515		359.8	1570	0	2771.6	3.8	108.6	644.4	452.2	738.8
1254.25	182	5206.8	3847.2	349567	5421.6	1.3534	0.014895	64.4767		468.6	1605.6	0	2682.6	0	98.6	512.6	386.6	719.325
1250.4	183	5162.8	3717.4	337859	5763	1.38882	0.0152809	58.6256		458.4	1588.6	0	2661.4	1.6	80.8	485.6	438	714.3
1246	184	5045.4	3792.4	336910	5924	1.3304	0.0149755	56.8721		388.6	1653	0	2585.4	4.4	112	615.4	410.4	721.15
1242.1	185	4926	3788	338473	6935	1.30042	0.0145536	48.8065		362	1502.8	0	2540.6	1.2	78.2	574.2	346.4	675.675
1238.2	186	5060	3940	355404	8505.2	1.28426	0.0142373	41.7867		329.2	1650.2	0	2674.4	5.4	128.2	781.6	496.2	758.15
1233.95	187	5045	3845.8	351648	9458	1.31182	0.0143467	37.18		448.2	1645	0	2718.6	0	118.6	625.6	438	749.25
1230.2	188	4893	3734.2	359010	7527.8	1.31032	0.0136292	47.6912		672.2	1673.8	0	2589.8	0	107	650.2	465.4	769.8
1226.4	189	5127.8	3811.6	347219	7718.2	1.34531	0.0147682	44.9871		602.6	1639.8	0	2642.4	0	91.8	635.2	356.6	746.05
1222.1	190	4956.6	3715	345146	10171	1.33421	0.0143609	33.9343		449.2	1623	0	2599.2	0	101	632	367	721.425
1218.3	191	5115.6	3812.8	347751	9196.4	1.34169	0.0147105	37.8138		365.2	1572	0	2612.2	0	113	543.2	513	714.825
1214.45	192	5078	3784	354095	8524.8	1.34197	0.0143408	41.537		381	1602.6	0	2781	4	146.4	625.6	425.6	745.775
1210.65	193	5066	3627.2	341166	8772.2	1.39667	0.0148491	38.8917		327.4	1506	0	2558.4	0	78.4	682	397.8	693.75
1206.4	194	5146.8	3854.4	345625	7780.6	1.33531	0.0148913	44.4214		276.6	1512.6	0	2677.4	0	99.8	431	548.6	693.25
1202.55	195	5338.4	3710.2	346458	7026.4	1.43884	0.0154085	49.308		395.4	1504.8	0	2675.6	1.8	90.4	529.2	501.6	712.35
1198.7	196	5305	3607.2	337449	6600	1.47067	0.0157209	51.1287		424.2	1506.8	0	2598.2	0	108.2	459	361.8	682.275
1194.45	197	5260.8	3755.4	340941	6420	1.40086	0.0154302	53.1061		422.8	1465.2	0	2666.2	0	89.2	457.2	320.8	677.675
1190.55	198	5559	3798.4	345242	6540.4	1.46351	0.0161018	52.786		381.6	1590.8	0	2731	0	101.8	563.6	318.2	710.875
1186.75	199	5473	3840	342343	7658.8	1.42526	0.0159869	44.6992		414.6	1623.6	0	2810.8	0	130.4	473.4	416.2	733.625
1183.45	200	5260.2	3683.2	335805	9099.4	1.42816	0.0156644	36.9041		392.6	1524.4	0	2632.6	3	133.4	622.6	265.6	696.775
1179.85	201	5136	3799.2	341557	8821.8	1.35186	0.015037	38.7174		382.8	1572.8	0	2697.4	0	131.2	484	402.8	708.875
1176.5	202	5293.6	3683.4	345006	9236.4	1.43715	0.0153435	37.3529		349.8	1544.6	0	2714.4	1.6	102.2	598.6	414.8	715.75
1172.6	203	5344.6	4089	349765	10073.8	1.30707	0.0152805	34.7203		429.2	1581.4	0	2832.2	0	137.6	515	440.4	741.975
1169.3	204	5299.4	3922	343145	7682	1.3512	0.0154436	44.6688		478.8	1582	0	2786	0	109.8	550.4	526.4	754.175
1165.6	205	5189.4	3766.6	339605	6349.8	1.37774	0.0152807	53.4828		488	1583.4	0	2625.6	0	121.4	548.4	420	723.35
1162.4	206	5666.2	3734.6	346743	7395.2	1.51722	0.0163412	46.8875		386	1595.8	0	2748.8	0	130	596.8	388	730.675
1158.55	207	5253.6	3693.6	340892	7267.6	1.42235	0.0154113	46.9057		373.2	1664.8	0	2769	0	114	492.2	444.6	732.225
1155.35	208	5192.4	3743	337506	6769.6	1.38723	0.0153846	49.8561		354	1528.8	0	2669.8	2.6	104.6	453	520.8	704.2
1151.65	209	5325.2	3737	331561	6419.6	1.42499	0.016061	51.6482		434.2	1619.4	0	2525.2	0	94.4	524.2	366.4	695.475
1148.4	210	5571.8	3813	359738	6519	1.46126	0.0154885	55.183		598.8	1745.4	0	2781	0	117.2	437.6	526	775.75
1144.65	211	5211.64	3734.95	355996	5968.25	1.39537	0.0146396	59.6483		533.74	1692.52	0	2703.45	0	108.46	389.88	504.7	741.594
1141.25	212	4851.48	3656.9	352254	5417.5	1.32666	0.0137727	65.0215		468.68	1639.64	0	2625.9	0	99.72	342.16	483.4	707.437
1137.4	213	4491.32	3578.85	348512	4866.75	1.25496	0.0128871	71.6109		403.62	1586.76	0	2548.35	0	90.98	294.44	462.1	673.281
1134	214	4131.16	3500.8	344770	4316	1.18006	0.0119824	79.8819		338.56	1533.88	0	2470.8	0	82.24	246.72	440.8	639.125
1130.05	215	3771	3422.75	341028	3765.25	1.10175	0.0110577	90.5725		273.5	1481	0	2393.25	0	73.5	199	419.5	604.969
1126.75	216	4691.6	4123	380993	5116	1.13791	0.0123141	74.4708		332.8	1712.2	0	2725.4	2.2	126.8	665.2	362.8	740.925
1122.9	217	4400	4060.4	379135	5957.6	1.08364	0.0116054	63.6388		305.2	1622.4	0	2580	4.4	150	626	396	710.5
1119.1	218	4749.8	3978.2	370737	5237.4	1.19396	0.0128118	70.7865		427.8	1696.2	0	2606.2	6.4	127.6	587.4	461.6	739.15
1115.8	219	5167	3595	362014	5688.4	1.43727	0.0142729	63.6407		419.6	1768.2	0	2664.2	5.4	156	579.4	485.2	759.75
1112.5	220	4937.8	3671.6	362265	6109.8	1.34486	0.0136304	59.2924		426.8	1764.6	38.6	2730.6	0	126	457	391.2	741.85
1108.8	221	4748	3634.8	342067	5551	1.30626	0.0138803	61.6226		387.2	1631.8	0	2508.6	0	134.2	503	566	716.35
1104.95	222	4737.8	3994.4	375399	4974.2	1.18611	0.0126207	75.4693		390.4	1741	0	2607.2	2.8	113	620	400	734.3
1101.6	223	4801.2	3403.6	340420	4946.8	1.41062	0.0141038	68.8161		408	1684.8	0	2445.8	4.2	103.6	543.8	528.4	714.825
1097.85	224	4898.2	3435.2	330048	4903	1.42588	0.0148409	67.3156		356.2	1671.8	0	2443.6	2.6	118.2	517	428.6	692.25
1093.95	225	4733	3800	356996	6701	1.24553	0.0132579	53.275		440.6	1661.6	0	2522.6	6	171	548.4	480	728.775
1090.65	226	4346.4	3906.6	360919	6540.2	1.11258	0.0120426	55.1847		416.8	1725.8	0	2517.4	2.8	148.4	686.6	574.2	759
1086.8	227	4274	3924	380093	6643.4	1.08919	0.0112446	57.2136		392	1555.8	0	2585.4	0	125.6	661.8	502.8	727.925
1083.05	228	4512.2	3918.6	364065	6865.4	1.15148	0.012394	53.0289		382.4	1550.6	0	2506	0	141	633.6	435.2	706.1
1079.8	229	4287.4	4026	386329	8582.4	1.06493	0.0110978	45.0141		446.4	1665.2	0	2705.6	0	120.8	564.2	531.4	754.2
1076.05	230	4167.6	3908	375122	7011	1.06643	0.01111	53.5048		397	1593.4	0	2676.8	7	133.6	669.2	514	748.875
1072.8	231	4390	4101.2	389898	7451	1.07042	0.0112594	52.3283		419.4	1646.8	13.4	2638	0	126.4	688	403.6	741.95
1068.95	232	4028.8	3913.2	370354	7311.6	1.02954	0.0108782	50.653		403.8	1545	0	2531.4	7.8	91.2	592.6	362.4	691.775
1065.65	233	4489.2	4208.2	379605	7342.2	1.06677	0.011826	51.7018		416.2	1582.6	0	2620	0	113.2	628.4	422.4	722.85
1061.85	234	4303	3963.2	369244	7261.4	1.08574	0.0116535	50.8503		368.2	1621	0	2602	0	87	577.4	453.8	713.675
1058.1	235	4287	4510.8	405220	9442.6	0.950386	0.0105794	42.914		358.6	1843.6	0	2709	3	139.6	787.8	616.4	807.25
1054.85	236	4200.6	4325.4	409335	9218.2	0.971147	0.010262	44.4051		417.6	1813.2	0	2613.8	0	106.8	544	570.8	758.275
1051.1	237	4233	4434.2	414871	11621.4	0.954625	0.0102032	35.6988		389.8	1855.8	0	2685	0	116.2	782	629.2	807.25
1047.3	238	4361.6	4487.4	410694	8918.8	0.971966	0.0106201	46.0481		355.8	1852.8	0	2707	0	124.2	755	472	783.35
1043.55	239	4279.6	4466.4	407512	8873.8	0.958177	0.0105018	45.923		325.2	1748.4	0	2616.4	2.2	127.6	773	496.6	761.175
1040.35	240	4361	4277.2	397152	6713.2	1.01959	0.0109807	59.1599		412.4	1825.6	0	2593	0	119.8	661.6	443.2	756.95
1036.65	241	4174	4436	404692	9103	0.940938	0.010314	44.457		302.4	1779.6	0	2636.4	2.2	115	726	555.4	764.625
1033.3	242	4145.2	4318	402305	8963.2	0.959981	0.0103036	44.8841		358.6	1738.2	0	2662.4	0	111.2	662.2	486.4	752.375
1029.4	243	4366	4253.8	393724	11722.4	1.02638	0.011089	33.5873		313.4	1672.2	0	2699.2	0	89.4	607	375.6	719.6
1026.15	244	4575.2	4089.6	392215	11057.6	1.11874	0.011665	35.4701		419.6	1742.8	12.4	2635.8	7.2	129.2	834	357.6	767.325
1022.3	245	4626.2	4245.4	385256	10636	1.0897	0.0120081	36.2219		358.8	1779	0	2683.4	0	128.2	638.8	561.2	768.675
1018.45	246	4610.4	4014.2	376392	9730.8	1.14852	0.0122489	38.6804		289.4	1681.2	0	2597.4	0	106	631.4	358.4	707.975
1015.2	247	4743.6	4048.6	371934	11146.2	1.17166	0.0127539	33.3687		301.2	1642.8	0	2717.4	0	99	754.4	542.8	757.2
1011.4	248	4686.4	4161.8	373426	11064.4	1.12605	0.0125497	33.7502		382	1656.4	0	2692.8	1.2	129.2	586.2	598.6	755.8
1008.05	249	4505.6	4346.4	380912	10621	1.03663	0.0118284	35.8641		302.2	1731.4	0	2698	0	99.6	669.8	453.2	744.275
1004.25	250	4773.2	4023.6	383671	9574.6	1.1863	0.0124409	40.0718		393.4	1782.6	9.8	2810.2	3.8	102.6	707.6	454.2	783.025
1000.4	251	4593.6	4316.8	392228	9822.6	1.06412	0.0117115	39.9312		353	1815.8	0	2732.6	0	100.6	720	542.2	783.025
997.1	252	4643.7	4282.8	380416	9114.8	1.08427	0.0122069	41.736		355.3	1787.1	0	2704.9	0	142.8	795.1	674.7	807.488
993.4	253	4768.2	4207.5	390938	9271.9	1.13326	0.0121968	42.1637		356.3	1831.3	0	2682.4	3.1	144.6	704.4	506.5	778.575
989.55	254	4616.3	4141.2	378499	9482.5	1.11473	0.0121963	39.9155		340.4	1762.7	0	2708.8	2.1	145.4	653.9	533.6	768.362
986.2	255	4833.4	4163	379337	9541.4	1.16104	0.0127417	39.757		365.2	1796.2	0	2737.2	0	94	689	434	764.45
982.45	256	4970.8	4378	382602	8906.4	1.1354	0.0129921	42.9581		311.8	1766.6	0	2757.6	0	111.4	454	442	730.425
978.6	257	5033.8	4538.6	388588	8232.8	1.10911	0.0129541	47.1999		313.4	1824	0	2815.8	0	131	703.8	530.2	789.775
975.4	258	4995.4	4351.8	391363	9051.2	1.14789	0.0127641	43.2388		293	1852	0	2797.8	0	101.8	615	364	752.95
971.6	259	5209.2	4190.4	381018	8649.2	1.24313	0.0136718	44.0524		286.8	1723.4	23.6	2833.2	0	122.8	512	322	727.975
968.3	260	5304	4170.6	375247	8396.6	1.27176	0.0141347	44.6904		343.4	1702.4	0	2949.6	5	144.8	575.4	289.6	751.275
964.55	261	5257.2	4082	371295	9107	1.2879	0.0141591	40.7702		280.4	1697.8	0	2783.6	0	129.4	577.6	288	719.6
960.85	262	5166.8	4262.4	368137	8612.6	1.21218	0.014035	42.744		318	1654	0	2853.8	6.6	140	707.6	328.2	751.025
957.7	263	4664.6	4250.6	371660	8041.2	1.0974	0.0125507	46.2194		293.6	1637.6	0	2748.6	0	118.2	578.4	349.2	715.7
953.95	264	4527.8	4349.2	394504	8026	1.04107	0.0114772	49.1532		336.8	1714.4	0	2647.4	9.4	115.6	790	505.4	764.875
950.1	265	4688.2	4229.6	379483	7595.4	1.10843	0.0123542	49.9622		263.4	1659.6	0	2752.8	8.6	112	568.2	417.8	722.8
946.85	266	5370.4	4111.8	361583	8142.8	1.30609	0.0148525	44.4053		335.2	1644.6	0	2888.6	0	113.6	635.8	472.8	761.325
943.2	267	5277.4	4169	362691	8051.2	1.26587	0.0145507	45.048		263	1614	0	2914.2	0	98.2	567	447.6	738
939.4	268	5250.2	4209.4	363932	7829.6	1.24726	0.0144263	46.4816		293.6	1680.4	0	2900.6	0	109.6	761.8	524.6	783.825
936.1	269	5128.8	4161.4	370520	7619.2	1.23247	0.0138422	48.6298		338	1708.2	0	2798.4	0	82.2	616.8	502.2	755.725
932.3	270	4940.4	4249.8	367968	8059	1.1625	0.0134262	45.6593		347.8	1671.4	0	2706.2	0	132.2	636.6	641.4	766.95
928.95	271	5111.8	4086.6	370206	8485.6	1.25087	0.013808	43.6275		265.6	1679.6	0	2839	0	119.8	655.8	449	751.1
925.4	272	5326.2	4264.4	368632	8773.4	1.24899	0.0144485	42.0171		301.4	1677.6	0	2874.4	0	89.6	704	421.4	758.55
921.65	273	5317.2	4146.6	359602	8231.2	1.2823	0.0147864	43.6876		455	1751.8	0	2853.8	5.4	122.4	489.8	513.6	773.975
918.35	274	4906.6	4019.4	343009	7690.2	1.22073	0.0143046	44.6034		355.4	1597.8	0	2698	3.6	111.4	517	411	711.775
915.05	275	4881	4199.2	362191	8466.4	1.16236	0.0134763	42.7799		380	1713.8	2.6	2776.2	5.6	98	711.2	335.6	752.875
911.25	276	5078.2	4231.6	372181	8160.2	1.20007	0.0136444	45.6093		373.6	1795.2	0	2767.4	0	100	591.4	443.8	758.925
907.6	277	5146.6	4188.6	374766	7649.6	1.22872	0.0137328	48.9916		378.4	1722.4	0	2797.2	0	65.2	602.2	545.2	763.825
904.4	278	5086	4114	369593	7510.8	1.23627	0.0137611	49.2082		375	1733	0	2804.4	0	125.4	649.6	297.2	748.075
900.7	279	5302.6	4343.6	371120	7596.6	1.22078	0.0142881	48.8534		389.6	1707.6	0	2841.8	0	133.2	655.6	480.6	776.05
897.05	280	5165.8	4155.6	371275	7768.2	1.24309	0.0139137	47.7942		416.8	1747.6	0	2775	0	119	512.6	446.4	752.175
893.8	281	5062.8	4162.6	370005	8080.2	1.21626	0.0136831	45.7915		426	1681.6	0	2791.2	0	116.2	705.8	617	792.225
890.3	282	5088.8	4102.8	369259	9122.4	1.24032	0.0137811	40.4783		390.8	1657.4	0	2814	0	102.8	501.6	505.6	746.525
886.65	283	5221.8	4228.2	371624	8448.6	1.23499	0.0140513	43.9864		384.6	1737	0	2920.6	0	127	679.8	481	791.25
883.65	284	5335	4224.4	373305	8547	1.2629	0.0142913	43.6767		466.6	1799	0	2752.2	0	117.2	789.2	478.8	800.375
880	285	4814.4	4142.4	380789	7391.6	1.16222	0.0126432	51.5165		328.2	1832.8	0	2778.2	4.8	82.2	665.4	619	788.825
876.7	286	4849.4	4183	386649	8548	1.15931	0.0125421	45.2327		334.8	1813.6	0	2615	0	118.2	693.8	593.6	771.125
873	287	4759.4	4472	386386	9084.6	1.06427	0.0123177	42.532		336.6	1841.8	0	2782.8	0	111.4	699.2	451.8	777.95
869.25	288	4685	4291.6	392220	9494	1.09167	0.0119448	41.3124		315.8	1835.4	0	2610	0	129.2	865.4	489.4	780.65
865.35	289	4950.4	4038.4	388560	9825.8	1.22583	0.0127404	39.5449		393.8	1757.6	0	2619.4	2.2	131.6	626.8	518.2	756.2
861.85	290	4797.8	4112.2	386330	9620	1.16672	0.0124189	40.1591		397.8	1775.8	0	2824.6	0	138	719.4	457.6	789.15
857.7	291	4875	4072.4	383828	10022.6	1.19708	0.012701	38.2962		516	1771.2	0	2745.6	1.8	119.2	594	525.8	784.2
853.65	292	4843.4	4252.4	376159	8987.6	1.13898	0.0128759	41.8531		448	1790.4	0	2797.8	0	135.2	626.4	554	793.975
849.4	293	5239	4157.2	378082	9219.6	1.26022	0.0138568	41.0085		477.4	1789.8	0	2755	3	102.8	541.6	415.8	760.675
845	294	5287.2	4194.2	391678	9105	1.2606	0.0134989	43.0179		348.2	1740.6	31.6	2674	5.6	103	587.6	482.8	746.675
840.75	295	5312.6	4178.8	392272	10251.2	1.27132	0.0135431	38.266		383	1815.4	0	2804.8	0	110.4	575.2	569.4	782.275
836.75	296	5026.4	4361.2	398698	8791	1.15253	0.012607	45.353		460	1816.2	0	2789.8	0	130.6	635.8	429.2	782.7
833	297	5012.6	4259.4	413804	10406.2	1.17683	0.0121135	39.7651		362.8	1841	0	2775.2	0	121.4	577	575	781.55
828.75	298	4922.8	4279	394822	9151.4	1.15046	0.0124684	43.1433		440	1781.8	0	2706.2	0	142	692.8	457	777.475
824.45	299	5267.4	4384.2	410370	10375.8	1.20145	0.0128357	39.5507		554.4	1931.8	0	2886.4	0	113.8	612.2	394	811.575
820	300	5610	4520.67	421137	7785.67	1.24097	0.0133211	54.0914		849	2072.33	0	2908	0	79	637.333	376.333	865.25
815.65	301	4527.33	3430	343781	6918.67	1.31992	0.0131692	49.6889		224	1611.67	0	2586.33	0	65.6667	30.3333	488.667	625.833
811.6	302	4971.8	4044.2	383895	7607	1.22937	0.0129509	50.466		477.8	1861.8	0	2697.2	0	143.4	602.4	431.4	776.75
807.4	303	4956.6	4182.6	386006	7400.8	1.18505	0.0128407	52.1574		440.2	1769.8	0	2696.2	0	112.4	669	415.6	762.9
803.1	304	4801	4049	387594	7745.2	1.18572	0.0123867	50.0431		439.6	1794.6	0	2591.2	0	145	535.6	330.4	729.55
798.95	305	4785.8	3993.2	392632	8756.6	1.19849	0.012189	44.8384		443	1872.6	19.6	2692.6	0	155.2	678.8	299.4	770.15
794.9	306	4742.4	4180.2	397644	8524.4	1.13449	0.0119262	46.6478		349.2	1834.6	0	2717.4	0	121.4	479.8	406.8	738.65
790.7	307	4923.4	4124.8	389109	8536	1.19361	0.012653	45.5845		424.2	1761.8	0	2717.6	0	140.8	660.2	324.2	753.6
786.55	308	5003.8	4164	393117	9143.8	1.20168	0.0127285	42.9928		428.8	1880.8	0	2713.6	0	168	717.6	422.8	791.45
782.9	309	4897.2	4110.8	385525	9075.2	1.1913	0.0127027	42.4811		378.2	1771.8	0	2678	0	152.6	614.4	555.2	768.775
778.65	310	5002	4035.6	385488	9496	1.23947	0.0129758	40.5948		312.2	1762.4	0	2666.8	0	107.2	574.6	413	729.525
774.4	311	4899.25	4228.5	390168	11588.2	1.15863	0.0125568	33.6693		442.75	1911	0	2668.25	9.25	153.75	1039.25	390	826.781
770.35	312	4911.6	4216.6	401306	9423.6	1.16482	0.012239	42.5852		349.8	1889.6	2.4	2706.6	0	149	540.8	373.6	751.475
766.4	313	4871.2	4213.2	398453	9297	1.15618	0.0122253	42.8582		398.4	1805.6	13.4	2656.4	0	123.2	691.8	312.4	750.15
762.3	314	4810.4	4235.2	396575	9476.8	1.13581	0.0121299	41.8469		326.8	1809.8	0	2694.4	0	105.6	673	278	735.95
758.25	315	4765.2	4237.2	400097	8998	1.12461	0.0119101	44.4651		359.2	1782.8	0	2758.6	0	122.2	531.8	388.8	742.925
754	316	5063	4176.8	395655	9671.6	1.21217	0.0127965	40.909		386.8	1813.2	0	2762	2	153.6	666.4	441.8	778.225
749.95	317	4784.4	4143.2	395643	8884.6	1.15476	0.0120927	44.5313		380.4	1819.6	0	2760.4	1.4	151.4	493.2	342.4	743.6
745.7	318	4957.6	4221.8	392344	9041	1.17429	0.0126359	43.3961		364	1734.2	0	2763.2	0	132.4	596.8	351.2	742.725
741.6	319	4871	4173	386961	9404.6	1.16727	0.0125878	41.1459		339.2	1746.6	0	2545.8	0	132.6	610.2	476.2	731.325
737.4	320	4773.4	4015.8	390846	9657.6	1.18865	0.012213	40.4703		436.2	1755.2	0	2637	3.4	141.2	549.6	449.2	746.475
733.15	321	5057	3995	389189	10759	1.26583	0.0129937	36.1734		459	1772.6	0	2723.6	0	140.4	686.8	436.2	777.325
729.05	322	4970	3930.4	382884	9273.8	1.2645	0.0129804	41.2867		423	1807.8	0	2620.2	4.4	147.4	598.4	406	750.9
725.55	323	4952.8	4006.8	366517	8721.2	1.2361	0.0135132	42.026		461.3	1804.5	0	2588.6	5.3	122.3	509.2	446.6	742.225
721.4	324	4900.4	4052.3	381499	8666.5	1.20929	0.0128451	44.02		400.6	1767.3	0	2639.7	0	113.8	504.2	473.2	737.35
717.05	325	4921	4135.4	392717	8944.3	1.18997	0.0125307	43.9069		402.9	1762.8	0	2748.9	0	107.7	556.2	508.2	760.837
712.85	326	4904.7	3974.1	389314	8977.7	1.23417	0.0125983	43.3646		386.5	1759.8	0	2583.1	0	115.5	571	469.5	735.675
708.75	327	4984.3	3983.5	394795	8287.6	1.25124	0.012625	47.6368		385.4	1782.7	0	2591.1	0	139.7	540	461.8	737.587
704.6	328	4896.5	4206.8	394278	8996.5	1.16395	0.0124189	43.8257		425.7	1829.1	0	2637.5	0.7	144.3	640	507.7	773.125
700.6	329	5034.7	4053.3	392243	9000.2	1.24212	0.0128357	43.5816		403	1806.1	0	2666.3	0	109	603.6	611.5	774.938
696.5	330	4957	4041.9	387314	8706.7	1.2264	0.0127984	44.4846		410.5	1795.1	0	2644.1	0.5	134.4	560.7	499.6	755.612
692.45	331	4903.1	3877.2	379026	8680.1	1.2646	0.0129361	43.6661		396.9	1764.1	0	2523.3	0	101.8	564.2	488.9	729.9
688.3	332	4706.2	3954	382944	8689	1.19024	0.0122895	44.0723		384	1707	0	2574.8	0	112.8	576.2	588.2	742.875
684.2	333	4727.8	4084.8	381487	8196	1.15741	0.0123931	46.5455		347.8	1776	0	2516.2	5.6	102	632	599.4	747.375
680.2	334	4770.2	3899	374641	8491	1.22344	0.0127327	44.1221		443	1713.2	0	2434.6	3.2	115.4	617.6	563.6	736.325
676	335	4617.8	4053.4	387063	7586	1.13924	0.0119304	51.0233		439.2	1739.8	0	2590.8	3.2	70.4	568.8	673.6	760.725
672	336	4787	3947.8	386682	6669.8	1.21257	0.0123797	57.9751		503.6	1820.6	0	2580.6	0	113.6	612.8	557	773.525
668	337	4666.2	3837.4	379750	8417.8	1.21598	0.0122876	45.1127		414.4	1687.6	0	2491.6	2.4	115.6	566.4	716.6	749.325
663.75	338	4770	3991.2	380676	8690.8	1.19513	0.0125303	43.8022		432	1744.4	0	2591.8	0	109.2	549.4	578.4	750.65
659.65	339	4581.2	4277.6	387235	8769.8	1.07097	0.0118305	44.1555		458	1756.6	0	2545.2	0	119.4	665.6	637.6	772.8
655.6	340	4505.6	4172.6	385264	8302.8	1.07981	0.0116948	46.4017		435.4	1749	0	2513.8	0	69	637	671.2	759.425
651.95	341	4835	4081.4	382069	7984.6	1.18464	0.0126548	47.8508		371.4	1710.6	0	2577.4	6.2	100.4	658	638.8	757.85
647.95	342	4699.6	3937.2	380818	9218.6	1.19364	0.0123408	41.3097		323.8	1726	0	2561.6	1.2	100	615.4	731	757.375
644	343	4581.6	3858	380406	9141	1.18756	0.012044	41.6153		431	1760.6	0	2619.6	0	132	615.6	665.2	778
639.95	344	4825.2	4082	384300	9051.6	1.18207	0.0125558	42.4566		384.4	1726.6	0	2563.6	0	82	665.2	676.2	762.25
636.4	345	4809.4	4062	386148	8729.2	1.184	0.0124548	44.2364		388	1837.2	0	2521.2	0	92.6	748.6	694.8	785.3
632.25	346	4854	4128	386593	10486.2	1.17587	0.0125558	36.8669		353.6	1759.6	0	2675.6	0	126.2	613.8	570	762.35
628.7	347	4787.8	4145.4	398544	10154	1.15497	0.0120132	39.25		376	1800.6	0	2627.2	2	95.6	729	569.8	775.025
624.75	348	4695.8	3888.8	393175	9214.4	1.20752	0.0119433	42.6697		393.6	1768.4	0	2605.2	10.2	78.2	639.4	540.8	754.475
621.35	349	4702.4	3986.8	390686	9659.2	1.17949	0.0120363	40.4471		410.2	1780.4	0	2523.2	0	76.2	501.4	547.8	729.9
617.95	350	4719.2	4010.8	385257	9261.6	1.17662	0.0122495	41.5972		457.6	1801.2	0	2552.4	0	111.4	596.2	581.4	762.525
614.05	351	4760.2	3830	380338	8610	1.24287	0.0125157	44.174		380	1688.2	0	2556.8	6	107	635	623	749.5
610.7	352	4674	4037.6	376757	8816.8	1.15762	0.0124059	42.7317		406.4	1713	0	2419.2	9	140.6	674.2	578.8	742.65
607.2	353	5072.67	4239.33	392067	8739.33	1.19657	0.0129383	44.8623		489	1909.33	0	2738	2	121	786.667	601.667	830.958
603.35	354	4662.2	3730.6	385499	8906	1.24972	0.0120939	43.2853		402.8	1831.6	0	2678.4	0	131.4	371	589.4	750.575
600.1	355	4648	4169.8	389748	10466.4	1.11468	0.0119256	37.238		416.6	1899.6	0	2572.4	0	146.4	648.4	724.8	801.025
596.95	356	4490.6	4056	385681	8873	1.10715	0.0116433	43.4668		493	1868	0	2538.8	0	89	709	562	782.475
593.5	357	4805.4	3991.8	387589	9472.4	1.20382	0.0123982	40.9177		363.4	1908.2	0	2585	0	130.8	506.6	378	734
589.8	358	4763.8	4022	386260	8008.4	1.18444	0.0123331	48.2319		421.6	1758	0	2622.6	0	135	530.4	457.8	740.675
586.4	359	4665.4	4060	389213	8947	1.14911	0.0119868	43.502		441.2	1775.6	0	2608.8	0	106.8	627.4	328	735.975
583.3	360	4598.2	4123	394346	8180.4	1.11526	0.0116603	48.2062		368.2	1846	0	2614.6	0	87	608.6	408.8	741.65
579.45	361	4693.6	4162.6	393350	9215	1.12756	0.0119324	42.6859		364.6	1817	0	2617.2	0	118.2	542	493.6	744.075
576.1	362	4662.6	4152.4	394581	9777.4	1.12287	0.0118166	40.3564		392	1805	0	2554.8	0	115.6	582	360.6	726.25
572.8	363	4689.2	4174.8	400154	9008.6	1.12322	0.0117185	44.4191		389	1907.4	0	2708	0	133.2	688.4	308.8	766.85
568.85	364	4730.2	4084.4	399630	9622.2	1.15811	0.0118365	41.532		498.4	1881.2	0	2607.2	1.8	125.4	586	314	751.75
565.55	365	4730.2	4084.4	399630	9622.2	1.15811	0.0118365	41.532		498.4	1881.2	0	2607.2	1.8	125.4	586	314	751.75
562.3	366	4697.2	4134.4	404596	9238.6	1.13613	0.0116096	43.794		403.2	1806.4	0	2661.2	0	101.8	555.4	462.4	748.8
558.3	367	4710.6	4308.2	398904	10316.8	1.0934	0.0118089	38.6655		423.6	1864.4	0	2578	0	137	600.2	422.4	753.2
554.9	368	4672.2	4067.6	401934	9520.2	1.14864	0.0116243	42.219		424.8	1829	0	2663.8	0	143.8	496.8	372.2	741.3
551.7	369	4595.4	4095	396939	10370.4	1.1222	0.0115771	38.2762		365.6	1832	0	2643	0	111.2	599.6	416.6	746
548.4	370	4842.6	4149.4	395491	10065	1.16706	0.0122445	39.2937		416.2	1899.8	0	2578.8	0	136.4	693.6	379.6	763.05
544.65	371	4882.2	4169.2	394726	9170.2	1.17102	0.0123686	43.0444		478.4	1833.4	0	2617	0	81.2	556	344.4	738.8
541.25	372	4795.8	4069	395290	9094.6	1.17862	0.0121324	43.4642		436.2	1880.8	6	2581.6	0	129.2	558	319.6	738.925
538.1	373	4854.8	4175.4	399343	9424	1.16271	0.012157	42.3751		492	1883.2	0	2683	0	126.2	439.2	366	748.7
534.2	374	4812.4	4078.8	397781	10173.8	1.17986	0.0120981	39.0986		397	1818.8	0	2491.4	2.8	165.6	508.6	467.6	731.475
530.85	375	4761.6	4055.6	383755	9909	1.17408	0.0124079	38.7279		445.4	2093.2	0	2573	0	200.4	696	354.8	795.35
527.55	376	4727	4209.6	396143	9636.8	1.12291	0.0119326	41.1073		491	1881.6	0	2578.6	0	101.2	753.2	309.6	764.4
523.9	377	4657.2	4287	401357	8491.6	1.08635	0.0116036	47.2651		445.8	1842.6	0	2711.8	0	129.8	537.2	461.2	766.05
520.7	378	4849.8	4286.2	403971	9334.8	1.13149	0.0120053	43.2758		428.4	1838.8	0	2668.6	0	108.2	700	463.6	775.95
517.35	379	4567.2	4185.2	405756	9996.4	1.09127	0.011256	40.5902		352.2	1796	0	2619.4	1.2	125.8	777	493.2	770.6
513.4	380	4794	4139.8	404867	10257.6	1.15803	0.0118409	39.47		434	1860	0	2652.6	0	112	691.8	392	767.8
510.3	381	4640.4	4123.6	404086	10089	1.12533	0.0114837	40.0521		425.2	1829	0	2556	0	141.8	577.2	442.8	746.5
506.95	382	4871.8	4219.8	403171	10342.2	1.15451	0.0120837	38.9831		428	1836.8	0	2678.4	0	125	428.4	382.8	734.925
503.6	383	4903.8	4395.8	418343	10669	1.11556	0.011722	39.2111		491.6	1997.8	0	2747.4	0	147	494.4	513.6	798.975
500.35	384	5563	5625	565473	10395	0.988978	0.00983778	54.3986		501	2061	0	2448	0	141	475	579	775.625
496.45	385	5011.44	4916.19	493520	9428.19	1.01937	0.0101545	52.3451		491.188	2093.88	0	2059.5	0	119.625	438.625	539.812	717.828
493.1	386	4459.88	4207.38	421566	8461.38	1.06001	0.0105793	49.8224		461.375	1126.75	0	2671	0	98.25	502.25	400.625	657.531
489.85	387	3908.31	3498.56	349613	7494.56	1.11712	0.011179	46.6489		291.562	1059.62	0	2082.5	0	76.875	365.875	561.438	554.734
486.55	388	3356.75	2789.75	277660	6527.75	1.20324	0.0120894	42.5353		221.75	1392.5	0	2094	0	55.5	429.5	422.25	576.938
482.8	389	3978.8	3448.8	315238	7281.4	1.15368	0.0126216	43.2936		241	1481	0	2139.2	0	57.8	563.4	301.4	597.975
479.6	390	3968	3640.8	321737	7506.8	1.08987	0.0123331	42.8594		194.6	1467	0	2217.4	4.8	70.4	532.4	268.8	594.425
476.3	391	4069.8	3413.2	317361	8057.8	1.19237	0.0128239	39.3856		169.6	1403	0	2338.4	0	73.2	532.4	346.2	607.85
472.35	392	3951.2	3548.2	325184	7141	1.11358	0.0121507	45.5376		175	1508.4	0	2236.8	1.6	71.8	554	237.2	598.1
468.95	393	3833.8	3657	333653	6968.8	1.04835	0.0114904	47.8781		241.2	1505.6	0	2269.2	0	98.2	667	328.6	638.725
465.6	394	3956.8	3567.4	326940	8239	1.10916	0.0121025	39.682		201	1435	0	2295.8	0	68.6	592	402.8	624.4
462.15	395	4082.6	3537	324114	6535.6	1.15426	0.0125962	49.5921		239.6	1436.8	3.2	2229.8	0	68.6	519.8	321.2	602.375
458.9	396	3999.6	3537	324388	7448.2	1.13079	0.0123297	43.5526		267.2	1495.2	0	2199.4	5	94.6	636	389.8	635.9
455.1	397	3968.4	3422.6	326617	8315.2	1.15947	0.01215	39.2795		275.8	1472.2	0	2200.8	0	75.8	517	432.2	621.725
451.75	398	3809	3483.2	327874	8412.2	1.09353	0.0116173	38.976		213	1503.2	34.8	2182.2	1.6	80.4	564	355.8	616.875
448.4	399	3915.4	3750.2	325833	8047.4	1.04405	0.0120166	40.4893		263.6	1554	0	2149.4	8.4	78	605.6	274	616.625
445.1	400	3909	3559.2	324634	8598.8	1.09828	0.0120412	37.7534		276.8	1492.4	0	2175.4	0	69.8	495.6	260.6	596.325
441.9	401	3857.8	3640	320576	7726.2	1.05984	0.012034	41.492		314.6	1458	6.4	2208.6	0	87.8	635.4	276.2	623.375
437.95	402	3851.8	3371.8	322405	8069	1.14236	0.0119471	39.9561		283.6	1513.4	0	2158.2	1.4	88.6	542	346.8	616.75
434.55	403	3903.6	3460.8	320810	7496.4	1.12795	0.0121679	42.7952		211.2	1437.8	0	2193.6	0	92	558.8	345.6	604.875
431.3	404	3831.2	3413	320809	7315.6	1.12253	0.0119423	43.8527		236.2	1429.2	0	2100.4	0	89.6	671.2	277.4	600.5
427.6	405	3749.8	3539	318602	13613.4	1.05956	0.0117696	23.4035		266.2	1484.4	0	2155.4	0	86.8	805.2	405	650.375
424.1	406	3797.4	3502.4	322844	6266.2	1.08423	0.0117624	51.5214		222	1464.2	19	2198.2	0	70.2	689.6	311.4	621.825
420.8	407	3810.4	3358.8	323444	8173.6	1.13445	0.0117807	39.5718		234.4	1516.2	0	2074.2	0	74.4	612.2	388.2	612.45
417.3	408	3741.6	3414	329564	7289.6	1.09596	0.0113532	45.2101		245.8	1500.8	0	2100.2	0	84.2	560	451.2	617.775
413.95	409	3695.6	3489.4	326548	6416.4	1.05909	0.0113172	50.8928		355.6	1467	0	2115	2	76.8	588.2	226	603.825
409.85	410	3616.2	3434.6	315707	6586.2	1.05287	0.0114543	47.9347		344.4	1519.8	0	2141.4	0	85.6	586	353.2	628.8
406.55	411	3631.8	3483.2	303281	5163.4	1.04266	0.011975	58.7367		270.8	1469.4	0	2114.2	3	64.4	501.8	435	607.325
403.25	412	3816.4	3469.8	305864	4269.8	1.09989	0.0124775	71.6342		228	1482.4	0	2096.6	2.6	71.4	531	429	605.125
400.05	413	3653.4	3455.8	316859	10081.4	1.05718	0.01153	31.4301		229.6	1433.6	0	2139.4	0	85.2	508.6	427.2	602.95
396.75	414	3749.4	3473.8	322130	8496.8	1.07934	0.0116394	37.9119		201	1392	0	2144	0	51.8	474.8	348.4	576.5
393.45	415	3804	3592.4	318903	5644.4	1.0589	0.0119284	56.499		306.8	1555.6	0	2254.6	0	53.8	506.2	394	633.875
390.2	416	3909.2	3548.8	326532	9115.8	1.10156	0.0119719	35.8204		254.8	1483.2	0	2181	0	83.8	584.6	494.2	635.2
386.85	417	3805.4	3458.2	326899	6932.6	1.1004	0.0116409	47.1539		241.6	1481.4	0	2123.4	0	49.8	441.4	379	589.575
382.8	418	3662.2	3405.8	329022	7540.6	1.07528	0.0111305	43.6335		241.8	1436.4	0	2103.8	0	51.2	422.6	463.4	589.9
379.35	419	3876	3339.6	328627	8356.6	1.16062	0.0117945	39.3254		277.2	1480	0	2134	5.6	80	507.2	354.8	604.85
375.85	420	3786.8	3463.6	330622	8991	1.09331	0.0114535	36.7726		345	1497	0	2072.2	0	77.4	490.4	465	618.375
371.9	421	3678.6	3540.6	333322	7951	1.03898	0.0110362	41.922		294.4	1553.6	0	2071.2	0	78.4	586.8	255	604.925
368.3	422	3712.4	3420.4	333602	7054.2	1.08537	0.0111282	47.2912		289	1565.6	0	2063	0	67.2	525.6	435.2	618.2
364.7	423	3971.4	3275	318949	8159	1.21264	0.0124515	39.0917		304.8	1451.6	9.8	2050.6	0	62.6	475.8	332.4	585.95
360.7	424	3763.4	3301	317579	8360.6	1.14008	0.0118503	37.9852		277.2	1458	0	2060	1.4	99.4	690.8	441.8	628.575
357.35	425	3814.6	3328.6	319223	8379.6	1.14601	0.0119496	38.0953		281.2	1468	0	2097.6	0	74.6	549.8	423	611.775
353.95	426	3666.4	3307.4	315242	7397.4	1.10854	0.0116304	42.6153		212.6	1360.6	0	2044.6	0	79.4	508.8	444.2	581.275
349.8	427	3657.4	3319.2	326461	8000.2	1.10189	0.0112032	40.8066		301	1533.2	0	2061	1.4	111.4	562.2	514.6	635.6
346.2	428	3697	3413.67	319253	8145.67	1.083	0.0115802	39.193		311	1441.33	0	2046	3.66667	107.667	598.667	618.333	640.833
342.75	429	3843.4	3590.4	333703	8111.4	1.07047	0.0115174	41.14		346.333	1521.27	0	2118.67	2.93333	105.067	666.467	612.267	671.625
339.15	430	3989.8	3767.13	348152	8077.13	1.05911	0.0114599	43.1034		381.667	1601.2	0	2191.33	2.2	102.467	734.267	606.2	702.417
335.25	431	4136.2	3943.87	362602	8042.87	1.04877	0.011407	45.0837		417	1681.13	0	2264	1.46667	99.8667	802.067	600.133	733.208
331.5	432	4282.6	4120.6	377051	8008.6	1.03931	0.0113581	47.0808		452.333	1761.07	0	2336.67	0.733333	97.2667	869.867	594.067	764
327.9	433	4429	4297.33	391501	7974.33	1.03064	0.0113129	49.0951		487.667	1841	0	2409.33	0	94.6667	937.667	588	794.792
323.65	434	4503.6	4128.8	401682	7335.6	1.09078	0.0112119	54.7578		457	1779.6	0	2568	0	130.4	637.4	429.8	750.275
319.75	435	4555.6	4255.2	405792	11056.6	1.0706	0.0112264	36.7013		476.6	1939.6	0	2536.2	0	139.2	705.2	407.2	775.5
316.15	436	4464.4	4110	410608	11519.6	1.08623	0.0108727	35.6443		386	1796.6	0	2533.6	0	103	599.8	419.2	729.775
312.15	437	4424.2	4367.4	412637	9646.6	1.01301	0.0107218	42.7754		371.8	1870.2	0	2563.2	0	139.2	557.4	408.6	738.8
308.45	438	4282.2	4136.2	410795	9932.4	1.0353	0.0104242	41.3591		369.8	1810	2.2	2458.4	0	151.4	705.6	356.2	731.7
304.9	439	4178.6	4276.2	413381	9285	0.977176	0.0101084	44.5214		334.4	1816.6	17.6	2497	7.8	135	796.2	207.2	726.475
300.8	440	4063.6	4170.6	420241	9966.4	0.974344	0.00966969	42.1658		425	1826.2	0	2502.6	0	133.4	651.6	356.2	736.875
297.1	441	4287.4	4263.8	416945	10327	1.00553	0.0102829	40.3743		400.6	1789.2	0	2519.4	0	104.2	621	434.2	733.575
293.45	442	4305.2	4071	424031	12630.4	1.05753	0.010153	33.5722		452.6	1863.6	0	2489.8	0	120.6	725.4	527	772.375
289.2	443	4145	4207.6	421275	11416.6	0.985122	0.00983918	36.9002		417	1824.8	36.8	2522.4	7	131.4	568.8	332.4	730.075
285.6	444	4104.4	4182.6	426548	11301	0.981303	0.00962236	37.7443		454.8	1900.8	0	2534	0	124.4	846.4	548.8	801.15
282.1	445	4133.8	4356.6	424971	9092.2	0.948859	0.00972726	46.7402		426.8	1911.2	0	2467.4	0	109.2	652.8	365.2	741.575
277.7	446	4030.6	4208.2	429748	10627	0.957797	0.00937898	40.4393		392.6	1897.6	0	2432.4	0	138	728.4	534.6	765.45
274.05	447	4057.4	4274.6	429256	12249.4	0.949188	0.00945217	35.043		337.2	1944.4	0	2495	0	96.6	663.4	448.8	748.175
270.4	448	4202.4	4225	424561	10110.4	0.994651	0.00989822	41.9925		399	1951.4	0	2474	0	127.2	742.6	433.4	765.95
266.25	449	4148.2	4207.6	425885	7965.2	0.985883	0.0097402	53.4682		431.8	1899.4	0	2500	0	88.6	740	345.6	750.675
262.8	450	4132	4458.4	426038	10504.8	0.92679	0.00969867	40.5565		441.4	1891.8	0	2428.8	2.2	102.6	802.4	397.4	758.325
259.1	451	4318.2	4406	414774	10557.8	0.980073	0.010411	39.286		339.4	1811.4	0	2564.4	0	77.6	701.4	400.2	736.8
255.1	452	4266.2	4335.6	420169	9192.4	0.983993	0.0101535	45.7083		469.4	1834.8	0	2540.4	0	96.4	617.6	515	759.2
251.3	453	4271.4	4225.8	424074	8862	1.01079	0.0100723	47.8531		373	1911.8	0	2534.2	0	89	679.4	555.8	767.9
247.6	454	4221.4	4388.6	427250	10460.8	0.961901	0.0098804	40.8429		470.2	1934.8	0	2567.8	4.4	186.4	875.8	467.4	813.35
243.75	455	4374	4446.6	420647	8411.4	0.983673	0.0103983	50.0092		365.2	1936	0	2532.6	0	121	714.4	407.6	759.6
239.65	456	4096.4	4457.4	427891	9331.6	0.919011	0.00957346	45.854		427.6	1915	0	2497.6	6	118.4	828.4	470.8	782.975
236.35	457	4406.4	4368	421800	11024.8	1.00879	0.0104467	38.2592		409	1843.4	0	2592.6	0	129	613.6	386.6	746.775
232.5	458	4544.2	4284.4	411789	7451	1.06064	0.0110353	55.2663		378.4	1826.8	0	2495.8	0	148	555.8	393.8	724.825
228.3	459	4562.2	4172.8	411516	9327.6	1.09332	0.0110863	44.1181		376.4	1821	0	2553.4	0	94.8	628.4	327.8	725.225
224.55	460	4460.2	4234.2	411182	8705.4	1.05337	0.0108473	47.233		422	1847.6	0	2536	0	126.8	725.6	560.4	777.3
220.8	461	4581.4	4244.8	410077	12928.4	1.0793	0.011172	31.7191		439	1872.2	0	2432.8	0	97.2	759.2	409.6	751.25
216.7	462	4625.4	4193	412792	10908	1.10312	0.0112052	37.843		375.2	1874.4	0	2606.8	0	137.4	693.2	485.6	771.575
213.05	463	4478.6	4249.2	410236	10043.6	1.05399	0.0109171	40.8455		325	1809.8	0	2652.4	0	98.8	701.8	509.2	762.125
209.4	464	4538.2	4184.6	400849	9790.8	1.0845	0.0113215	40.9414		559.8	2420.4	11	2520	2.2	407.8	759.6	336.2	877.125
205.2	465	4719	4150.8	403478	9984.8	1.13689	0.0116958	40.4092		499	2327	0	2533.8	0	367.4	760	430.2	864.675
201.9	466	4698.2	4212.2	410305	10666.6	1.11538	0.0114505	38.4663		424.4	1825.4	0	2556.2	0	110	617	196.2	716.15
198	467	4587.6	4192.8	401476	9234	1.09416	0.0114268	43.478		435.6	1811	0	2585	0	89	801.2	432.2	769.25
193.8	468	4582.6	4199	406376	8786.8	1.09136	0.0112767	46.2485		401.8	1884.8	0	2640.6	4.8	106.6	646.6	338.2	752.925
189.75	469	4646.6	4286.8	406876	10255.2	1.08393	0.0114202	39.6751		448	1886	0	2438.6	1.8	103.6	823.8	384.6	760.8
186	470	4563.4	4376.4	410488	8769	1.04273	0.011117	46.8113		355	1908.6	0	2629.4	0	97.6	739.8	387.8	764.775
182.5	471	4746.6	4123.6	400612	7312.6	1.15108	0.0118484	54.7839		382	1768	0	2638.6	0	96.4	649	452.6	748.325
178.25	472	4843.8	4070	401582	7808.2	1.19012	0.0120618	51.4308		379.2	1783.8	0	2643.2	0	111.8	709.8	368.6	749.55
174.55	473	4737.2	4273.8	409370	8854	1.10843	0.0115719	46.2356		371	1832	0	2654.4	0	98.8	747.4	239.6	742.9
171.1	474	3939.7	3307.5	325352	6637.4	1.19114	0.012109	49.018		426.7	1508.6	0	2269.7	1.8	90.1	385.9	357.8	630.075
166.9	475	4394.2	3518.3	334272	7821.9	1.24896	0.0131456	42.7354		338.7	1615	0	2267.6	0	90.1	534.9	365.9	651.525
163.4	476	4375.8	3540.2	335894	7180.6	1.23603	0.0130273	46.7779		368.8	1599.5	0	2339.5	0	92.8	559.3	419.1	672.375
159.8	477	4465.4	3552.5	335736	7139.2	1.25697	0.0133003	47.0271		343.4	1590.1	0	2278.5	3.4	94.6	621.5	363.4	661.862
155.65	478	4410.2	3587.9	342599	8419.9	1.22919	0.0128728	40.6892		322.2	1551.6	0	2273.9	2.2	84.8	636.1	298.1	646.113
152.05	479	4277.3	3639.5	343754	9068.8	1.17524	0.0124429	37.9052		330.7	1610.8	0	2236.9	3.7	141.9	717.1	327.9	671.125
148.4	480	4317.1	3621.8	340466	8989.8	1.19198	0.01268	37.8725		282.3	1552.5	2.7	2318.1	5.4	105.9	622.2	298.9	648.5
144.6	481	4334.7	3459.4	340315	10138.9	1.25302	0.0127373	33.5653		329.8	1590.9	0	2317.6	4	84.8	616.9	426.1	671.263
140.8	482	4132.5	3507.3	343006	8807.7	1.17826	0.0120479	38.9439		297.7	1582.1	0	2267.2	3.3	99.4	665.1	348.7	657.938
136.65	483	4058.2	3317.5	321792	8595.6	1.22327	0.0126112	37.4369		363.2	1487.9	78.2	2199.4	2.6	33.3	605.8	221.1	623.938
133.1	484	4060.4	3143.6	295862	7173.4	1.29164	0.0137239	41.2444		246.2	1334.8	0	2035	4.2	61.6	452.4	218.4	544.075
129.3	485	3922	3120.4	291788	6970.8	1.25689	0.0134413	41.8586		213.4	1293.8	0	2158	0	75.8	500	430.8	583.975
125.2	486	4109	3109.4	291951	7915.2	1.32148	0.0140743	36.8849		212	1289.2	0	2159.8	0	80.8	489.8	231.6	557.9
121.55	487	4120.6	3129.6	294768	7453.8	1.31665	0.0139791	39.546		296.6	1266.8	0	2029.6	3.8	78.8	522.4	313.4	563.925
118.05	488	4014.4	2989	291138	5798.2	1.34306	0.0137887	50.2118		279.6	1287.8	0	2032	0	70	462.8	225	544.65
113.75	489	4149.8	3023	288397	6082.6	1.37274	0.0143892	47.4134		232	1267.4	0	1983.4	0	69.6	458.8	305.4	539.575
110.1	490	3982.4	3074.6	286687	7270.6	1.29526	0.0138911	39.4311		217.6	1232	0	2109.2	2.6	70	574.4	237.2	555.375
106.6	491	4166.4	2916.2	296164	6152.6	1.42871	0.0140679	48.1365		192.8	1284.6	0	2068.6	9.2	79.4	527.2	273.6	554.425
102.35	492	4051.8	3083.6	288732	4564.8	1.31398	0.0140331	63.2518		229.2	1264.8	0	2142.6	4.8	76.4	528.2	280.2	565.775
98.45	493	3944.8	3060.6	288447	5991.2	1.2889	0.013676	48.145		155	1257	0	2146.2	2.4	79.4	366.8	291.6	537.3
94.9	494	4279.4	3115.6	278062	4746.6	1.37354	0.0153901	58.5813		285	1265.2	0	2046.4	0	75.8	501.4	204.8	547.325
91.2	495	4095	3029.2	285242	7159.6	1.35184	0.0143562	39.8405		223.4	1268.4	5.4	2106.6	2.4	71.6	462.6	252	549.05
87.3	496	4139.8	3104.6	287358	7432.2	1.33344	0.0144064	38.6639		220.8	1354.6	30.4	2145.2	7.8	78.8	530.2	183.6	568.925
83.2	497	4024.6	3036.8	287511	6972.6	1.32528	0.0139981	41.2345		271.6	1317	0	2034	0	54.8	521.2	234	554.075
79.75	498	4273.4	3080.4	287833	7308.8	1.38729	0.0148468	39.3816		278	1343.2	0	2070.8	0	81.2	560.4	345.4	584.875
76.3	499	4128	3073.8	291673	7679.4	1.34296	0.0141529	37.9812		247.8	1278.2	0	2064.2	0	49.2	475.8	115.8	528.875
72.15	500	4167.4	3007.6	289602	7016.8	1.38562	0.0143901	41.2727		173.6	1279.2	0	2134.2	0	40.8	428.8	349.8	550.8
68.5	501	4109	3053.4	291105	7309	1.34571	0.0141152	39.8283		229.2	1302.4	0	2218.8	5.6	79.6	466.8	285.8	573.525
64.5	502	4211.8	3135.4	288993	7402.8	1.34331	0.0145741	39.0383		244.8	1302.2	0	2068	0	66.4	446.2	317	555.575
60.5	503	4089.2	3079.8	291267	7881	1.32775	0.0140393	36.9582		220.8	1283.8	0	2115.2	0	78.8	496.4	399.2	574.275
56.5	504	4137.6	3083.8	294499	7005.8	1.34172	0.0140496	42.0365		207	1320	0	2107.8	0	101.2	433	312.2	560.15
52.5	505	4093.6	3040.6	294763	7245.6	1.34631	0.0138878	40.6816		219.2	1260.6	0	2135.2	3.6	80.4	278	332.8	538.725
49	506	4227.8	3146.2	295591	7854.6	1.34378	0.0143029	37.6329		305.4	1418.6	1	2095	6.6	117	569.8	290.4	600.475
45	507	4204.6	3201.4	301840	8256.6	1.31336	0.0139299	36.5574		192.8	1330.8	0	2132	11.4	80.6	411.6	244.2	550.425
41	508	4123.2	3179.2	298508	8916.2	1.29693	0.0138127	33.4793		230.8	1316.6	15.8	2107.4	0	81.8	549.8	222.6	565.6
37	509	4249.4	3263	300958	8990.4	1.3023	0.0141196	33.4755		219.4	1369.8	0	2232.8	0	65.8	612.2	317.4	602.175
33	510	4080.8	3082.6	295840	7966.6	1.32382	0.013794	37.135		205.6	1358	0	2097.2	0	79.4	549.6	161	556.35
29.5	511	3905.6	3096.8	293064	8405.6	1.26117	0.0133268	34.8653		204.4	1299.6	0	2173.6	0	71	409.2	249.6	550.925
25.5	512	4094	3206.6	297083	8381	1.27674	0.0137807	35.4472		239.2	1307	0	2086	0	87	473.4	334.8	565.925
21.5	513	4033	3302.4	300977	8008.4	1.22123	0.0133997	37.5827		252	1396.4	0	2174.8	0	61.4	507.2	301.4	586.65
17.5	514	4130.2	3230.8	303921	9153.4	1.27838	0.0135897	33.2031		193.4	1385	0	2195.6	0	78.6	496	280.8	578.675
13.5	515	3982.4	3074.6	289585	9963.8	1.29526	0.0137521	29.0637		165.4	1259.2	4	2087.4	1.6	83	522.6	177	537.525
10	516	4178.4	3108.8	293768	10236	1.34406	0.0142235	28.6995		193.8	1225.8	0	2183.8	2.8	49.8	493.8	254.2	550.5
6	517	4361.4	3123.6	293308	8467.6	1.39627	0.0148697	34.6389		163.8	1317.4	0	2224.6	0	91	525.6	282	575.55
2	518	4208.4	3090	294838	9920.8	1.36194	0.0142736	29.7192		170.8	1289.2	0	2223	8.4	72.4	514.8	314.8	574.175
-1	519	4306.4	3119.4	297631	8867.6	1.38052	0.0144689	33.5639		221.8	1334.4	8.2	2124.4	0	56	514.6	266.8	565.775
-4	520	4214.4	3051.8	295799	9340	1.38096	0.0142475	31.6701		160.6	1275.2	0	2097.6	5.8	105.4	470.8	281.2	549.575
-7	521	4086.6	3021.4	295802	14787.2	1.35255	0.0138153	20.0039		187.4	1283	0	2255.6	2.2	68.4	535.8	309	580.175
-10	522	4083.2	2992.6	295276	19806	1.36443	0.0138284	14.9084		217.8	1373.2	0	2173.2	0	87.4	593.4	324.6	596.2
-13	523	4171.25	3194	303303	16157.8	1.30596	0.0137528	18.7713		181	1374.25	0	2093.5	1.5	112.5	658.25	463	610.5

## Sheet: NORMALISED DATA
SUPPLEMENTAL DATA FILE 2: POWICK HAMS ITRAX XRF ANALYSIS NORMALISED DATA
Modelled Calendrical Date	Depth(cm)	LogZr:Rb	LogZr:Fe	LogFe:Mn	Combined Heavy Metals (Log Avr.tcps)
2017	1	0.34284	0.390874	1.66358	2.8008
2015.4	2	0.313648	0.348211	1.6674	2.82122
2011.95	3	0.22477	0.23908	1.68501	2.91218
2008.05	4	0.229479	0.22796	1.69475	2.93998
2004.25	5	0.249003	0.249601	1.6859	2.92359
2000.4	6	0.244394	0.251134	1.68467	2.93139
1996.2	7	0.245491	0.261771	1.68298	2.92984
1991.95	8	0.240758	0.262697	1.67849	2.92139
1987.2	9	0.280448	0.305018	1.69281	2.91695
1983.15	10	0.245108	0.288153	1.7137	2.92011
1979.05	11	0.323976	0.36638	1.70444	2.86161
1974.75	12	0.288227	0.320992	1.68864	2.89214
1970	13	0.321913	0.354384	1.68299	2.90459
1965.65	14	0.284331	0.33367	1.68964	2.89513
1961.5	15	0.292984	0.399754	1.66014	2.80113
1957.3	16	0.289935	0.363253	1.71677	2.82502
1952.6	17	0.309962	0.35507	1.70404	2.83418
1948.25	18	0.323279	0.368618	1.69662	2.8491
1943.95	19	0.310008	0.35671	1.66876	2.8861
1939.2	20	0.298102	0.345281	1.68367	2.79518
1934.95	21	0.307045	0.334717	1.68145	2.85653
1930.65	22	0.269708	0.318417	1.68807	2.85452
1926.4	23	0.317407	0.349208	1.67278	2.8747
1921.65	24	0.308107	0.352561	1.68408	2.85738
1917.45	25	0.322894	0.357355	1.69208	2.88377
1913.25	26	0.299328	0.338971	1.7006	2.87348
1909.05	27	0.280766	0.342689	1.68217	2.85706
1904.3	28	0.32258	0.37481	1.66125	2.83689
1900.2	29	0.334461	0.379146	1.67256	2.84045
1895.9	30	0.322163	0.365663	1.67913	2.79288
1891.7	31	0.336368	0.337794	1.64437	2.85795
1887.05	32	0.385123	0.391659	1.63597	2.86773
1882.8	33	0.334324	0.342889	1.68619	2.86491
1878.4	34	0.332071	0.342967	1.67372	2.86985
1874.05	35	0.332716	0.362824	1.68385	2.84709
1869.9	36	0.338507	0.359386	1.65509	2.81005
1865.2	37	0.301533	0.319611	1.68107	2.80961
1861	38	0.341899	0.356721	1.65082	2.80166
1856.75	39	0.353405	0.395758	1.66645	2.81235
1852.05	40	0.375577	0.409502	1.60997	2.81437
1847.85	41	0.387048	0.404239	1.66637	2.76692
1843.65	42	0.333677	0.366178	1.65516	2.75546
1839.05	43	0.392062	0.410251	1.61122	2.74302
1834.85	44	0.320615	0.344558	1.67923	2.74974
1830.6	45	0.3151	0.343895	1.70254	2.75195
1826.5	46	0.326171	0.347217	1.65131	2.77124
1821.9	47	0.298663	0.316095	1.70976	2.74821
1817.65	48	0.264967	0.290384	1.71337	2.78746
1813.6	49	0.295594	0.327888	1.691	2.79348
1809	50	0.29492	0.342446	1.70321	2.75314
1804.95	51	0.253892	0.293477	1.74944	2.75685
1801	52	0.267774	0.334895	1.69168	2.71798
1796.85	53	0.302799	0.338987	1.70713	2.71027
1792.2	54	0.288268	0.330906	1.72098	2.74658
1788.05	55	0.285106	0.342003	1.72349	2.73749
1784.1	56	0.24055	0.266083	1.7083	2.77815
1780	57	0.23168	0.270254	1.68234	2.74451
1775.85	58	0.225798	0.255066	1.74069	2.76421
1771.75	59	0.230742	0.291222	1.77191	2.67875
1767.5	60	0.20951	0.233778	1.73112	2.76606
1763.35	61	0.206896	0.240562	1.67053	2.76795
1758.55	62	0.216779	0.255723	1.77871	2.74871
1754.35	63	0.22161	0.27652	1.78182	2.73823
1750	64	0.232788	0.279602	1.80052	2.717
1745.25	65	0.266816	0.186187	1.81149	2.69263
1741	66	0.244542	0.245781	1.79424	2.6721
1736.75	67	0.225325	0.307813	1.77444	2.73984
1732.65	68	0.217747	0.330057	1.78405	2.67541
1727.9	69	0.181969	0.228176	1.78921	2.80681
1723.85	70	0.251593	0.315683	1.76194	2.64382
1719.75	71	0.207953	0.240967	1.78329	2.76438
1715.05	72	0.228635	0.241158	1.78771	2.81194
1710.95	73	0.201496	0.236959	1.72723	2.8201
1706.8	74	0.213658	0.249169	1.76535	2.83101
1702.2	75	0.201161	0.223012	1.75803	2.82913
1698	76	0.185731	0.216472	1.79982	2.89241
1693.35	77	0.198042	0.223314	1.74338	2.87753
1689.2	78	0.177054	0.191871	1.8391	2.88586
1684.9	79	0.168832	0.202418	1.8067	2.86838
1680	80	0.179188	0.204393	1.8325	2.8675
1675.7	81	0.179352	0.229121	1.84048	2.80214
1671.1	82	0.187776	0.256718	1.73203	2.77034
1666.95	83	0.184171	0.195628	1.85038	2.7859
1662.45	84	0.16915	0.205556	1.81689	2.83642
1658.2	85	0.163663	0.210622	1.84527	2.78707
1653.5	86	0.174665	0.191902	1.79953	2.82169
1649.55	87	0.162472	0.16255	1.86977	2.93724
1645.5	88	0.166479	0.174214	1.76532	2.98701
1640.9	89	0.183977	0.182266	1.84115	2.90862
1636.25	90	0.141334	0.185004	1.88919	2.8567
1632.05	91	0.177537	0.205731	1.81592	2.82148
1627.6	92	0.170144	0.197114	1.83889	2.83677
1623.4	93	0.187808	0.192123	1.86028	2.7838
1618.9	94	0.184163	0.20349	1.87323	2.87274
1614.75	95	0.179487	0.215544	1.88797	2.79445
1610.2	96	0.196407	0.206606	1.84193	2.78661
1606.35	97	0.181323	0.193497	1.82317	2.77252
1601.95	98	0.150337	0.185667	1.8822	2.78186
1597.8	99	0.155753	0.190049	1.83904	2.79178
1593.1	100	0.183525	0.18912	1.87688	2.7977
1589.05	101	0.181028	0.175738	1.83876	2.83401
1585.2	102	0.152535	0.187219	1.81137	2.8075
1580.9	103	0.173178	0.205706	1.88979	2.79485
1577.1	104	0.189475	0.212437	1.9009	2.7981
1573.1	105	0.159979	0.195701	1.89561	2.80149
1568.55	106	0.160966	0.202534	1.84139	2.79982
1564.55	107	0.147604	0.199157	1.84578	2.83409
1560.3	108	0.162634	0.183974	1.89273	2.80489
1555.85	109	0.169167	0.200509	1.86625	2.78477
1551.55	110	0.155476	0.186626	1.87282	2.7731
1547.65	111	0.111426	0.144672	1.52725	2.75347
1542.9	112	0.13066	0.149341	1.84867	2.80135
1538.55	113	0.138965	0.162283	1.72964	2.83636
1533.95	114	0.0886572	0.12537	1.87235	2.82943
1529.2	115	0.0719465	0.106424	1.69425	2.75743
1524.4	116	0.0926451	0.100196	1.71673	2.78066
1520.2	117	0.0561375	0.0962152	1.76129	2.77688
1515.8	118	0.0410467	0.103394	1.86144	2.73947
1511.35	119	0.0283724	0.0690988	1.94873	2.74949
1506.8	120	0.0529378	0.0879144	1.82511	2.72724
1502.15	121	0.0529378	0.0879144	1.82511	2.72724
1497.6	122	0.0330247	0.067609	1.71622	2.78422
1493.55	123	0.0225633	0.0681946	1.87142	2.7577
1489.35	124	0.0292345	0.0605864	1.84498	2.72892
1484.5	125	0.0186137	0.0629016	1.88324	2.7492
1480.1	126	0.0143142	0.0528837	1.8322	2.74052
1476.1	127	0.0236738	0.0559431	1.84272	2.7537
1471.6	128	0.00399056	0.0545579	1.82376	2.77605
1467.5	129	0.0200648	0.0678428	1.83158	2.74202
1463.35	130	0.0371137	0.062954	1.83353	2.74212
1459.1	131	0.020798	0.0583588	1.81301	2.75168
1454.7	132	0.0333057	0.0440998	1.92625	2.73666
1450.85	133	0.0207215	0.0473702	1.92043	2.76528
1446.8	134	0.0211714	0.0567435	1.91435	2.73574
1442.25	135	0.0141477	0.0666695	1.90338	2.75242
1438.1	136	0.0319517	0.090513	1.78861	2.79576
1434.2	137	0.0340022	0.0750598	1.86869	2.80307
1429.9	138	0.0308408	0.0858333	1.84015	2.80987
1426.05	139	0.0301624	0.0667276	1.88889	2.86897
1421.95	140	0.0128934	0.0620242	1.97207	2.80559
1417.75	141	0.0402764	0.0668584	1.90592	2.8483
1413.75	142	0.0309805	0.0739164	1.75518	2.85798
1410.1	143	-0.00148768	0.0522832	1.88613	2.84133
1406.35	144	-0.0023785	0.0447901	1.84459	2.8596
1402.5	145	0.0182751	0.0528488	1.88711	2.84255
1398.35	146	-0.00231903	0.0558479	1.82473	2.85813
1394.6	147	0.0184782	0.0547437	1.74067	2.86013
1390.75	148	0.026794	0.0534121	1.72818	2.82315
1386.8	149	0.0162954	0.0551478	1.72275	2.88861
1382.25	150	0.0153848	0.0655349	1.71854	2.86481
1378.75	151	0.000593878	0.0359148	1.72401	2.82196
1374.9	152	0.0107172	0.0605345	1.71424	2.81974
1370.9	153	-0.00317096	0.0361573	1.65531	2.8645
1367	154	0.0249823	0.0650723	1.78302	2.82468
1363	155	0.0176162	0.0667739	1.58602	2.84754
1358.5	156	0.0261033	0.078568	1.60417	2.85944
1354.45	157	0.0154891	0.0705895	1.72341	2.84426
1350.3	158	0.0482924	0.0846071	1.7053	2.86705
1346.25	159	0.0623727	0.0997668	1.67838	2.9176
1342	160	0.0658163	0.119184	1.7211	2.83211
1337.95	161	0.0937139	0.136881	1.75906	2.85344
1334.2	162	0.078045	0.137817	1.7664	2.84887
1329.8	163	0.0706574	0.114079	1.77755	2.86537
1325.9	164	0.0783486	0.121687	1.66566	2.85718
1322	165	0.0920343	0.14487	1.69815	2.84172
1318.2	166	0.0983542	0.155132	1.72512	2.82419
1314.35	167	0.0984287	0.144066	1.70124	2.85603
1310.55	168	0.10148	0.145337	1.67352	2.84683
1306.15	169	0.145388	0.180234	1.64966	2.81281
1302.15	170	0.130572	0.175777	1.70492	2.85556
1298.2	171	0.122576	0.19097	1.66001	2.83133
1294.3	172	0.144093	0.189042	1.68857	2.80046
1290	173	0.151189	0.186676	1.70308	2.84903
1286.05	174	0.129578	0.182269	1.67519	2.86492
1282.15	175	0.144454	0.186664	1.68775	2.87424
1278.25	176	0.141746	0.183764	1.64265	2.83683
1274.05	177	0.132135	0.164558	1.6871	2.87542
1270.25	178	0.131274	0.164175	1.77951	2.85031
1266.4	179	0.111257	0.180238	1.75491	2.84497
1262.5	180	0.141974	0.187573	1.78401	2.827
1258.1	181	0.141522	0.185104	1.78498	2.86853
1254.25	182	0.131426	0.173041	1.8094	2.85693
1250.4	183	0.142646	0.18415	1.76809	2.85388
1246	184	0.123981	0.175381	1.7549	2.85803
1242.1	185	0.114084	0.162971	1.68848	2.82974
1238.2	186	0.108654	0.153428	1.62104	2.87976
1233.95	187	0.117874	0.156753	1.57031	2.87463
1230.2	188	0.117378	0.134469	1.67844	2.88638
1226.4	189	0.128824	0.169327	1.65309	2.87277
1222.1	190	0.125225	0.157181	1.53064	2.85819
1218.3	191	0.127653	0.167629	1.57765	2.8542
1214.45	192	0.127742	0.156573	1.61844	2.87261
1210.65	193	0.145094	0.171699	1.58986	2.8412
1206.4	194	0.125581	0.172932	1.64759	2.84089
1202.55	195	0.158014	0.187761	1.69292	2.85269
1198.7	196	0.167515	0.196477	1.70866	2.83396
1194.45	197	0.146396	0.188372	1.72514	2.83102
1190.55	198	0.165396	0.206874	1.72252	2.85179
1186.75	199	0.153894	0.203765	1.6503	2.86547
1183.45	200	0.154777	0.194915	1.56707	2.84309
1179.85	201	0.130933	0.177162	1.58791	2.85057
1176.5	202	0.157502	0.185924	1.57232	2.85476
1172.6	203	0.116298	0.184139	1.54058	2.87039
1169.3	204	0.130719	0.188749	1.65	2.87747
1165.6	205	0.139168	0.184143	1.72821	2.85935
1162.4	206	0.181048	0.213285	1.67106	2.86372
1158.55	207	0.153007	0.18784	1.67123	2.86464
1155.35	208	0.142148	0.187087	1.69772	2.8477
1151.65	209	0.153813	0.205773	1.71305	2.84228
1148.4	210	0.164729	0.190009	1.74181	2.88972
1144.65	211	0.14469	0.165529	1.7756	2.87017
1141.25	212	0.122761	0.139018	1.81306	2.84969
1137.4	213	0.0986305	0.110156	1.85498	2.8282
1134	214	0.0719047	0.0785423	1.90245	2.80559
1130.05	215	0.0420814	0.0436662	1.957	2.78173
1126.75	216	0.0561076	0.0904042	1.87199	2.86977
1122.9	217	0.0348839	0.064659	1.80372	2.85156
1119.1	218	0.0769887	0.107609	1.84995	2.86873
1115.8	219	0.15754	0.154513	1.80374	2.88067
1112.5	220	0.128678	0.134508	1.773	2.87032
1108.8	221	0.11603	0.1424	1.78974	2.85513
1104.95	222	0.0741252	0.101083	1.87777	2.86587
1101.6	223	0.149411	0.149335	1.83769	2.8542
1097.85	224	0.154084	0.171459	1.82812	2.84026
1093.95	225	0.0953529	0.122473	1.72652	2.86259
1090.65	226	0.0463307	0.0807199	1.74182	2.88024
1086.8	227	0.0371055	0.0509451	1.7575	2.86209
1083.05	228	0.0612574	0.0932099	1.72451	2.84887
1079.8	229	0.0273202	0.0452369	1.65335	2.87749
1076.05	230	0.0279315	0.045713	1.72839	2.87441
1072.8	231	0.0295536	0.0515137	1.71874	2.87037
1068.95	232	0.0126437	0.0365582	1.70461	2.83996
1065.65	233	0.0280726	0.072837	1.71351	2.85905
1061.85	234	0.0357254	0.0664577	1.70629	2.8535
1058.1	235	-0.0221001	0.024463	1.6326	2.90701
1054.85	236	-0.0127149	0.0112324	1.64743	2.87983
1051.1	237	-0.020167	0.00873561	1.55265	2.90701
1047.3	238	-0.0123489	0.0261279	1.66321	2.89396
1043.55	239	-0.0185544	0.021263	1.66203	2.88148
1040.35	240	0.00842653	0.0406289	1.77203	2.87907
1036.65	241	-0.0264391	0.0134274	1.64794	2.88345
1033.3	242	-0.0177371	0.0129903	1.65209	2.87643
1029.4	243	0.0113067	0.0448921	1.52618	2.85709
1026.15	244	0.0487293	0.0668863	1.54986	2.88498
1022.3	245	0.0373058	0.0794748	1.55897	2.88574
1018.45	246	0.0601396	0.0880987	1.58749	2.85002
1015.2	247	0.0688032	0.105642	1.52334	2.87921
1011.4	248	0.0515581	0.098635	1.52828	2.87841
1008.05	249	0.0156229	0.0729278	1.55466	2.87173
1004.25	250	0.0741948	0.0948507	1.60284	2.89378
1000.4	251	0.0269912	0.0686144	1.60131	2.89378
997.1	252	0.0351364	0.0866057	1.62051	2.90714
993.4	253	0.0543303	0.0862471	1.62494	2.8913
989.55	254	0.0471678	0.0862297	1.60114	2.88557
986.2	255	0.0648463	0.105227	1.59941	2.88335
982.45	256	0.0551505	0.11368	1.63304	2.86358
978.6	257	0.044974	0.112407	1.67394	2.8975
975.4	258	0.0599013	0.105991	1.63587	2.87677
971.6	259	0.0945156	0.135825	1.64397	2.86212
968.3	260	0.104405	0.150286	1.65021	2.8758
964.55	261	0.109881	0.151036	1.61034	2.85709
960.85	262	0.0835674	0.147213	1.63087	2.87565
957.7	263	0.0403642	0.0986688	1.66482	2.85473
953.95	264	0.0174779	0.0598363	1.69155	2.88359
950.1	265	0.0447068	0.0918138	1.69864	2.85902
946.85	266	0.115975	0.171798	1.64743	2.88157
943.2	267	0.102388	0.162883	1.65368	2.86806
939.4	268	0.0959557	0.159156	1.66728	2.89422
936.1	269	0.0907763	0.141204	1.6869	2.87836
932.3	270	0.0653936	0.127952	1.65953	2.88477
928.95	271	0.0972117	0.140131	1.63976	2.8757
925.4	272	0.0965595	0.159824	1.62343	2.87998
921.65	273	0.107991	0.169861	1.64036	2.88873
918.35	274	0.0866194	0.155475	1.64937	2.85234
915.05	275	0.0653422	0.129571	1.63124	2.87672
911.25	276	0.0792052	0.134955	1.65905	2.8802
907.6	277	0.0894515	0.13776	1.69012	2.88299
904.4	278	0.0921121	0.138653	1.69204	2.87395
900.7	279	0.086639	0.154975	1.68889	2.88989
897.05	280	0.0945039	0.143442	1.67938	2.87632
893.8	281	0.0850261	0.136184	1.66079	2.89885
890.3	282	0.093535	0.139284	1.60722	2.87304
886.65	283	0.0916647	0.147717	1.64332	2.89831
883.65	284	0.101369	0.155071	1.64025	2.90329
880	285	0.0652901	0.101858	1.71195	2.89698
876.7	286	0.0642001	0.0983707	1.65545	2.88712
873	287	0.0270504	0.0905308	1.62872	2.89095
869.25	288	0.0380904	0.0771801	1.61608	2.89246
865.35	289	0.088431	0.105182	1.59709	2.87864
861.85	290	0.0669679	0.0940835	1.60378	2.89716
857.7	291	0.0781242	0.103838	1.58316	2.89443
853.65	292	0.0565162	0.109779	1.62173	2.89981
849.4	293	0.100447	0.141663	1.61287	2.8812
845	294	0.100577	0.130297	1.63365	2.87313
840.75	295	0.104256	0.131719	1.58281	2.89336
836.75	296	0.061651	0.100613	1.65661	2.8936
833	297	0.0707146	0.0832688	1.5995	2.89296
828.75	298	0.0608699	0.0958108	1.63491	2.89069
824.45	299	0.0797059	0.108421	1.59715	2.90933
820	300	0.0937604	0.124539	1.73313	2.93714
815.65	301	0.120548	0.119561	1.69626	2.79646
811.6	302	0.089681	0.112301	1.703	2.89028
807.4	303	0.0737375	0.108589	1.71732	2.88247
803.1	304	0.0739839	0.0929549	1.69934	2.86306
798.95	305	0.0786335	0.0859691	1.65165	2.88658
794.9	306	0.0548011	0.0765035	1.66883	2.86844
790.7	307	0.0768622	0.102193	1.65882	2.87714
786.55	308	0.0797892	0.104778	1.6334	2.89842
782.9	309	0.0760215	0.103896	1.6282	2.8858
778.65	310	0.0932356	0.113133	1.60847	2.86304
774.4	311	0.0639433	0.0988782	1.52723	2.91739
770.35	312	0.0662606	0.0877476	1.62926	2.87591
766.4	313	0.0630239	0.0872589	1.63203	2.87515
762.3	314	0.0553073	0.0838563	1.62166	2.86685
758.25	315	0.0510022	0.0759156	1.64802	2.87094
754	316	0.0835642	0.107091	1.61182	2.89111
749.95	317	0.0624916	0.0825238	1.64867	2.87134
745.7	318	0.0697738	0.101604	1.63745	2.87083
741.6	319	0.0671697	0.0999512	1.61433	2.86411
737.4	320	0.0750558	0.0868219	1.60714	2.87302
733.15	321	0.102376	0.113732	1.55839	2.8906
729.05	322	0.10192	0.113289	1.61581	2.87558
725.55	323	0.0920531	0.130757	1.62352	2.87054
721.4	324	0.0825299	0.108738	1.64365	2.86767
717.05	325	0.0755358	0.0979739	1.64253	2.88129
712.85	326	0.0913737	0.100312	1.63714	2.86669
708.75	327	0.0973394	0.101233	1.67794	2.86781
704.6	328	0.0659339	0.0940829	1.64173	2.88825
700.6	329	0.0941648	0.108418	1.6393	2.88927
696.5	330	0.0886334	0.107155	1.64821	2.8783
692.45	331	0.101953	0.111802	1.64014	2.86326
688.3	332	0.0756337	0.0895347	1.64417	2.87092
684.2	333	0.0634883	0.0931796	1.66788	2.87354
680.2	334	0.0875834	0.104922	1.64466	2.86707
676	335	0.0566157	0.0766539	1.70777	2.88123
672	336	0.0837083	0.0927095	1.76324	2.88847
668	337	0.0849263	0.089466	1.6543	2.87467
663.75	338	0.0774149	0.0979629	1.6415	2.87544
659.65	339	0.0297791	0.0730046	1.64498	2.88807
655.6	340	0.0333459	0.067994	1.66653	2.88048
651.95	341	0.0735873	0.102254	1.67989	2.87958
647.95	342	0.0768734	0.0913437	1.61605	2.87931
644	343	0.0746549	0.0807703	1.61925	2.89098
639.95	344	0.0726423	0.0988452	1.62794	2.8821
636.4	345	0.073351	0.0953369	1.64578	2.89504
632.25	346	0.0703601	0.0988456	1.56664	2.88215
628.7	347	0.0625696	0.0796595	1.59384	2.88932
624.75	348	0.081894	0.0771233	1.63012	2.87764
621.35	349	0.0716951	0.0804915	1.60689	2.86326
617.95	350	0.0706374	0.0881181	1.61906	2.88225
614.05	351	0.0944264	0.097455	1.64517	2.87477
610.7	352	0.0635654	0.0936271	1.63075	2.87078
607.2	353	0.0779388	0.111876	1.65188	2.91958
603.35	354	0.0968122	0.0825681	1.63634	2.87539
600.1	355	0.0471509	0.076482	1.57099	2.90365
596.95	356	0.0442064	0.0660761	1.63816	2.89347
593.5	357	0.0805608	0.0933581	1.61191	2.8657
589.8	358	0.0735115	0.0910738	1.68333	2.86963
586.4	359	0.0603629	0.0787018	1.63851	2.86686
583.3	360	0.0473745	0.0667109	1.6831	2.8702
579.45	361	0.0521414	0.0767267	1.63028	2.87162
576.1	362	0.050329	0.072492	1.60591	2.86109
572.8	363	0.0504631	0.0688716	1.64757	2.88471
568.85	364	0.0637512	0.0732219	1.61838	2.87607
565.55	365	0.0637512	0.0732219	1.61838	2.87607
562.3	366	0.0554266	0.0648179	1.64141	2.87437
558.3	367	0.0387804	0.0722078	1.58732	2.87691
554.9	368	0.0601832	0.0653671	1.62551	2.86999
551.7	369	0.0500694	0.0635993	1.58293	2.87274
548.4	370	0.0670933	0.0879422	1.59432	2.88255
544.65	371	0.0685628	0.0923201	1.63392	2.86853
541.25	372	0.0713734	0.0839455	1.63813	2.8686
538.1	373	0.0654733	0.084825	1.62711	2.87431
534.2	374	0.0718293	0.0827172	1.59216	2.8642
530.85	375	0.0696978	0.0936991	1.58802	2.90056
527.55	376	0.0503448	0.0767338	1.61392	2.88332
523.9	377	0.0359714	0.0645945	1.67454	2.88426
520.7	378	0.0536514	0.0793741	1.63624	2.88983
517.35	379	0.0379338	0.0513853	1.60842	2.88683
513.4	380	0.0637187	0.0733857	1.59627	2.88525
510.3	381	0.0512789	0.0600818	1.60263	2.87303
506.95	382	0.0623976	0.0822004	1.59088	2.86624
503.6	383	0.0474948	0.0690005	1.59341	2.90253
500.35	384	-0.00481347	-0.00710281	1.73559	2.88965
496.45	385	0.00833388	0.00665789	1.71888	2.85602
493.1	386	0.0253115	0.0244569	1.69742	2.81792
489.85	387	0.0480996	0.0484019	1.66884	2.74409
486.55	388	0.0803537	0.0824065	1.62875	2.76113
482.8	389	0.0620841	0.101113	1.63642	2.77668
479.6	390	0.0373748	0.0910709	1.63205	2.7741
476.3	391	0.0764113	0.108019	1.59534	2.7838
472.35	392	0.0467209	0.0845998	1.65837	2.77677
468.95	393	0.0205045	0.0603342	1.68014	2.80531
465.6	394	0.0449923	0.0828763	1.59859	2.79546
462.15	395	0.0623018	0.100239	1.69541	2.77987
458.9	396	0.0533815	0.0909512	1.63901	2.80339
455.1	397	0.0642593	0.0845764	1.59417	2.7936
451.75	398	0.0388326	0.0651043	1.5908	2.7902
448.4	399	0.0187217	0.0797808	1.60734	2.79002
445.1	400	0.0407133	0.0806714	1.57696	2.77548
441.9	401	0.0252383	0.0804092	1.61796	2.79475
437.95	402	0.0578019	0.0772614	1.60158	2.79011
434.55	403	0.0522888	0.0852171	1.6314	2.78167
431.3	404	0.0501985	0.0770883	1.642	2.77851
427.6	405	0.0251275	0.0707602	1.36928	2.81316
424.1	406	0.0351206	0.0704942	1.71199	2.79367
420.8	407	0.0547864	0.0711709	1.59739	2.78707
417.3	408	0.0397938	0.0551179	1.65524	2.79083
413.95	409	0.0249342	0.0537374	1.70666	2.78091
409.85	410	0.0223763	0.058968	1.68065	2.79851
406.55	411	0.0181435	0.0782767	1.76891	2.78342
403.25	412	0.0413494	0.0961261	1.85512	2.78185
400.05	413	0.0241486	0.0618312	1.49735	2.78028
396.75	414	0.033157	0.0659311	1.57878	2.7608
393.45	415	0.0248558	0.0765822	1.75204	2.802
390.2	416	0.0420064	0.0781624	1.55413	2.80291
386.85	417	0.0415502	0.0659865	1.67352	2.77054
382.8	418	0.0315229	0.0465166	1.63982	2.77078
379.35	419	0.0646893	0.0716811	1.59467	2.78165
375.85	420	0.0387446	0.0589401	1.56552	2.79125
371.9	421	0.0166057	0.0428186	1.62244	2.7817
368.3	422	0.0355779	0.0464266	1.67478	2.79113
364.7	423	0.0837323	0.0952224	1.59208	2.76786
360.7	424	0.0569349	0.0737281	1.57961	2.79836
357.35	425	0.0591874	0.0773546	1.58087	2.78659
353.95	426	0.0447531	0.0655952	1.62957	2.76438
349.8	427	0.042139	0.0493417	1.61073	2.80318
346.2	428	0.0346283	0.0637145	1.59321	2.80675
342.75	429	0.0295728	0.061356	1.61426	2.82713
339.15	430	0.0249401	0.059182	1.63451	2.84659
335.25	431	0.0206793	0.0571716	1.65402	2.86523
331.5	432	0.0167471	0.055307	1.67284	2.88309
327.9	433	0.0131066	0.0535728	1.69104	2.90025
323.65	434	0.037736	0.0496779	1.73845	2.87522
319.75	435	0.0296256	0.0502421	1.56468	2.88958
316.15	436	0.0359213	0.0363361	1.55199	2.86319
312.15	437	0.00561178	0.0302668	1.63119	2.86853
308.45	438	0.0150654	0.018042	1.61657	2.86433
304.9	439	-0.0100272	0.0046805	1.64857	2.86122
300.8	440	-0.0112876	-0.0145873	1.62496	2.86739
297.1	441	0.00239718	0.0121152	1.6061	2.86544
293.45	442	0.0242922	0.00659593	1.52598	2.88783
289.2	443	-0.00650991	-0.00704115	1.56703	2.86337
285.6	444	-0.00819665	-0.0167184	1.57685	2.90371
282.1	445	-0.0227982	-0.0120096	1.66969	2.87016
277.7	446	-0.0187267	-0.0278444	1.6068	2.88392
274.05	447	-0.0226477	-0.0244685	1.5446	2.874
270.4	448	-0.00232933	-0.00444291	1.62317	2.8842
266.25	449	-0.00617476	-0.0114322	1.7281	2.87545
262.8	450	-0.0330187	-0.0132878	1.60806	2.87986
259.1	451	-0.00874174	0.0174914	1.59424	2.86735
255.1	452	-0.007008	0.00661679	1.66	2.88036
251.3	453	0.0046613	0.00312839	1.67991	2.8853
247.6	454	-0.0168695	-0.00522536	1.61112	2.91028
243.75	455	-0.00714928	0.0169608	1.69905	2.88058
239.65	456	-0.0366793	-0.0189312	1.66138	2.89375
236.35	457	0.00380129	0.0189771	1.58274	2.87319
232.5	458	0.0255674	0.0427827	1.74246	2.86023
228.3	459	0.0387468	0.0447872	1.64462	2.86047
224.55	460	0.022583	0.0353198	1.67425	2.89059
220.8	461	0.033141	0.0481326	1.50132	2.87578
216.7	462	0.0426244	0.0494182	1.57799	2.88738
213.05	463	0.0228351	0.0381085	1.61114	2.88203
209.4	464	0.0352297	0.0539028	1.61216	2.94306
205.2	465	0.0557182	0.0680303	1.60648	2.93685
201.9	466	0.0474225	0.0588251	1.58508	2.855
198	467	0.0390814	0.0579257	1.63827	2.88607
193.8	468	0.0379661	0.0521839	1.6651	2.87675
189.75	469	0.0350021	0.0576728	1.59852	2.88127
186	470	0.0181715	0.0459881	1.67035	2.88353
182.5	471	0.0611061	0.0736582	1.73865	2.87409
178.25	472	0.0755918	0.0814117	1.71122	2.8748
174.55	473	0.0447075	0.0634053	1.66498	2.87093
171.1	474	0.0759633	0.0831097	1.69036	2.79939
166.9	475	0.096547	0.11878	1.63079	2.81393
163.4	476	0.0920297	0.114856	1.67004	2.82761
159.8	477	0.0993263	0.123863	1.67235	2.82077
155.65	478	0.089618	0.109672	1.60948	2.81031
152.05	479	0.070128	0.0949213	1.5787	2.8268
148.4	480	0.0762676	0.103118	1.57832	2.81191
144.6	481	0.0979583	0.105078	1.52589	2.82689
140.8	482	0.0712399	0.080911	1.59044	2.81818
136.65	483	0.0875225	0.100758	1.5733	2.79514
133.1	484	0.111142	0.137479	1.61536	2.73566
129.3	485	0.0992973	0.12844	1.62179	2.76639
125.2	486	0.12106	0.148426	1.56685	2.74656
121.55	487	0.119472	0.14548	1.5971	2.75122
118.05	488	0.128095	0.139522	1.70081	2.73612
113.75	489	0.137589	0.158037	1.6759	2.73205
110.1	490	0.112356	0.142736	1.59584	2.74459
106.6	491	0.154944	0.148228	1.68247	2.74384
102.35	492	0.11859	0.147153	1.80107	2.75264
98.45	493	0.110218	0.13596	1.68255	2.73022
94.9	494	0.137841	0.187241	1.76776	2.73825
91.2	495	0.130926	0.157041	1.60032	2.73961
87.3	496	0.124974	0.158556	1.58731	2.75506
83.2	497	0.122307	0.146068	1.61526	2.74357
79.75	498	0.142166	0.171634	1.59529	2.76706
76.3	499	0.128064	0.150844	1.57957	2.72335
72.15	500	0.141645	0.158063	1.61566	2.74099
68.5	501	0.128952	0.149686	1.60019	2.75855
64.5	502	0.128175	0.163581	1.59149	2.74474
60.5	503	0.123116	0.147346	1.56771	2.75912
56.5	504	0.127662	0.147664	1.62363	2.7483
52.5	505	0.129146	0.142633	1.6094	2.73137
49	506	0.128328	0.155423	1.57557	2.77849
45	507	0.118385	0.143948	1.56297	2.7407
41	508	0.112917	0.140278	1.52478	2.75251
37	509	0.114711	0.149822	1.52473	2.77972
33	510	0.121828	0.139689	1.56978	2.74535
29.5	511	0.100775	0.124725	1.54239	2.74109
25.5	512	0.106103	0.139271	1.54958	2.75276
21.5	513	0.0867985	0.127095	1.57499	2.76838
17.5	514	0.106661	0.13321	1.52118	2.76243
13.5	515	0.112356	0.138369	1.46335	2.7304
10	516	0.128417	0.153006	1.45787	2.74076
6	517	0.144971	0.172302	1.53956	2.76008
2	518	0.134159	0.154533	1.47304	2.75904
-1	519	0.140043	0.160436	1.52587	2.75264
-4	520	0.14018	0.153739	1.50065	2.74003
-7	521	0.131154	0.140361	1.30112	2.76356
-10	522	0.134952	0.140772	1.17343	2.77539
-13	523	0.115931	0.13839	1.2735	2.78569
